# Supplementary material for: Evaluation of Zamia floridana A. DC. Leaves and Its Isolated Secondary Metabolites as Natural Anti-Toxoplasma and Anti-Cancer Agents Using In Vitro and In Silico Studies
Source: Metabolites. 2022 Dec 21;13(1):10. doi: 10.3390/metabo13010010 (PMC9866161; doi:10.3390/metabo13010010)
Supplement: Supplementary file 1 [file metabolites-13-00010-s001.zip › metabolites-2076770-supplementary.pdf]

## Article

# Evaluation of *Zamia floridana* A. DC. Leaves and Its Isolated Secondary Metabolites as Natural Anti-toxoplasma and Anti-cancer Agents Using In Vitro and In Silico Studies

Hosam M. El-Seadawy <sup>1</sup>, Kamilia A. Abo El-Seoud <sup>1</sup>, Mona El-Aasr <sup>1</sup>, Haytham O. Tawfik <sup>2</sup>, Wagdy Eldehna <sup>3,4,\*</sup> and Amany E. Ragab <sup>1,\*</sup>

<sup>1</sup> Department of Pharmacognosy, Faculty of Pharmacy, Tanta University, Tanta 31527, Egypt;

<sup>2</sup> Department of Pharmaceutical Chemistry, Faculty of Pharmacy, Tanta University, Tanta 31527, Egypt

<sup>3</sup> Department of Pharmaceutical Chemistry, Faculty of Pharmacy, Kafrelsheikh University, Kafrelsheikh 33516, Egypt

<sup>4</sup> School of Biotechnology, Badr University in Cairo, Badr City 11829, Egypt

\* Correspondence: amany.ragab@pharm.tanta.edu.eg (A.E.R.); wagdy2000@gmail.com (W.E.)

## Supplementary Materials

**Table S1.** Toxoplasmodicidal effect of *Z. floridana* methanol extract and its different fractions.

| Drug                             | EC <sub>50</sub> ± SEM (µg/mL) |
|----------------------------------|--------------------------------|
| Cotrimoxazole                    | 4.18±0.3                       |
| <i>Z. floridana</i> MeOH extract | 8.19±0.4                       |
| Pet. ether fraction              | 31.95±1.3                      |
| Chloroform fraction              | 16.71±0.8                      |
| Ethyl acetate fraction           | 9.74±0.5                       |
| <i>n</i> -butanol fraction       | 7.16±0.4                       |

**Table S2.** The percent inhibition of the cancer cells' viability under the effect of the different tested concentrations of *Z. floridana* leaves MeOH extracts.

| Conc.<br>( $\mu\text{g/mL}$ )           | HEPG-2 | MCF-7 | HCT-116 | PC3  | HELA | WISH |
|-----------------------------------------|--------|-------|---------|------|------|------|
| <b>Doxorubicin</b>                      |        |       |         |      |      |      |
| 100                                     | 6.3    | 6.2   | 7.1     | 8.8  | 7.3  | 8.4  |
| 50                                      | 11.2   | 10.9  | 13.9    | 16.3 | 12.1 | 17.1 |
| 25                                      | 14.1   | 14.3  | 18.7    | 21.7 | 18.9 | 24.3 |
| 12.5                                    | 28.3   | 26.9  | 31.4    | 38.9 | 30.8 | 33.5 |
| 6.25                                    | 45.8   | 41.5  | 47.9    | 59.2 | 51.7 | 56.6 |
| 3.125                                   | 57.6   | 58.4  | 60.5    | 73.6 | 62.4 | 69.2 |
| 1.56                                    | 71.2   | 69.1  | 73.8    | 95.3 | 74.0 | 88.6 |
| <b><i>Z. floridana</i> MeOH extract</b> |        |       |         |      |      |      |
| 100                                     | 26.8   | 20.1  | 27.3    | 35.7 | 33.1 | 31.2 |
| 50                                      | 40.2   | 31.7  | 38.1    | 50.5 | 42.7 | 47.3 |
| 25                                      | 52.1   | 45.2  | 47.2    | 62.6 | 54.2 | 54.1 |
| 12.5                                    | 68.7   | 52.8  | 65.0    | 71.3 | 66.9 | 76.2 |
| 6.25                                    | 84.9   | 76.3  | 78.4    | 92.8 | 87.0 | 88.4 |
| 3.125                                   | 99.4   | 95.2  | 91.8    | 100  | 100  | 100  |
| 1.56                                    | 100    | 100   | 100     | 100  | 100  | 100  |

**Table S3.** The percent inhibition of the cancer cells' viability under the effect of the different tested concentrations of *Z. floridana* leaves' different fractions.

| Conc. (µg/ml)                    | MCF-7 | HCT-116 | WISH |
|----------------------------------|-------|---------|------|
| <b>PE fraction</b>               |       |         |      |
| 100                              | 34.8  | 31.6    | 49.9 |
| 50                               | 47.3  | 41.9    | 75.2 |
| 25                               | 61.2  | 54.4    | 81.1 |
| 12.5                             | 73.6  | 65.1    | 89.9 |
| 6.25                             | 88.1  | 79.6    | 99.4 |
| 3.125                            | 100   | 98.2    | 100  |
| 1.56                             | 100   | 100     | 100  |
| <b>CHCl<sub>3</sub> fraction</b> |       |         |      |
| 100                              | 28.7  | 27.8    | 48.9 |
| 50                               | 41.0  | 38.2    | 66.2 |
| 25                               | 57.2  | 49.3    | 75.7 |
| 12.5                             | 61.4  | 63.7    | 91.4 |
| 6.25                             | 80.5  | 78.6    | 98.1 |
| 3.125                            | 98.9  | 95.1    | 100  |
| 1.56                             | 100   | 100     | 100  |
| <b>EtOAc fraction</b>            |       |         |      |
| 100                              | 23.8  | 7.9     | 34.6 |
| 50                               | 34.9  | 16.3    | 52.5 |
| 25                               | 48.0  | 27.0    | 60.0 |
| 12.5                             | 54.7  | 38.2    | 84.5 |
| 6.25                             | 75.2  | 54.1    | 97.1 |
| 3.125                            | 93.1  | 78.4    | 100  |
| 1.56                             | 100   | 95.9    | 100  |
| <b><i>n</i>-BuOH fraction</b>    |       |         |      |
| 100                              | 5     | 21.3    | 37.4 |
| 50                               | 26.3  | 28.2    | 56.7 |
| 25                               | 35.6  | 37.8    | 64.9 |
| 12.5                             | 40.9  | 51.4    | 89.9 |
| 6.25                             | 62.4  | 75.1    | 97.2 |
| 3.125                            | 81.2  | 93.9    | 100  |
| 1.56                             | 96.1  | 100     | 100  |

**Table S4.** Cytotoxic effect of *Z. floridana* methanol extract against different cell lines.

| Drug                                         | <i>In vitro</i> Cytotoxicity IC <sub>50</sub> ± SEM (µg/mL) |           |           |           |           |           |
|----------------------------------------------|-------------------------------------------------------------|-----------|-----------|-----------|-----------|-----------|
|                                              | HEPG-2                                                      | MCF-7     | HCT-116   | PC3       | HELA      | WISH      |
| Doxorubicin                                  | 4.50±0.2                                                    | 4.17±0.2  | 5.23±0.3  | 8.87±0.6  | 5.57±0.4  | 7.79±0.5  |
| Total MeOH extract of<br><i>Z. floridana</i> | 31.87±2.6                                                   | 20.57±1.7 | 27.33±2.3 | 48.48±3.5 | 36.36±2.9 | 40.29±3.2 |

**Table S5.** Cytotoxic effect of *Z. floridana* different fractions against MCF-7, HCT-116 and WISH cell lines.

| Drug                       | <i>In vitro</i> Cytotoxicity IC <sub>50</sub> ± SEM (µg/mL) |           |           |
|----------------------------|-------------------------------------------------------------|-----------|-----------|
|                            | MCF-7                                                       | HCT-116   | WISH      |
| Doxorubicin                | 4.17±0.2                                                    | 5.23±0.3  | 7.79±0.5  |
| Pet. ether fraction        | 45.06±3.1                                                   | 33.78±2.5 | 95.61±4.6 |
| Chloroform fraction        | 32.39±2.3                                                   | 28.16±2.1 | 84.15±4.4 |
| Ethyl acetate fraction     | 22.89±1.8                                                   | 9.04±0.8  | 54.26±3.1 |
| <i>n</i> -Butanol fraction | 12.33±1.1                                                   | 17.88±1.4 | 59.44±3.2 |

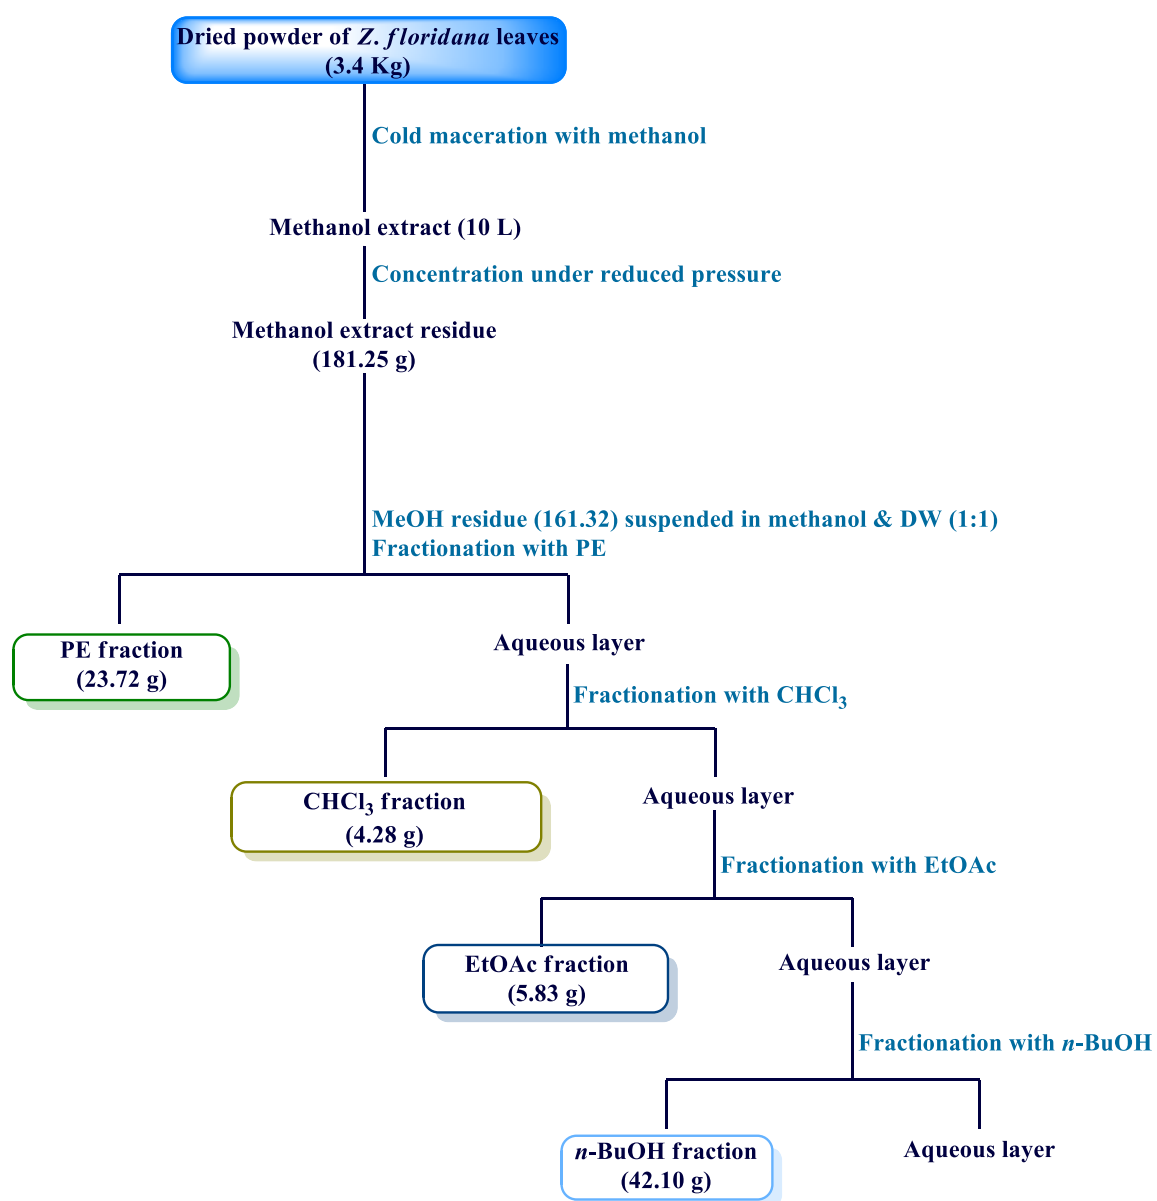

**Figure S1.** Extraction and fractionation steps of *Z. floridana* leaves

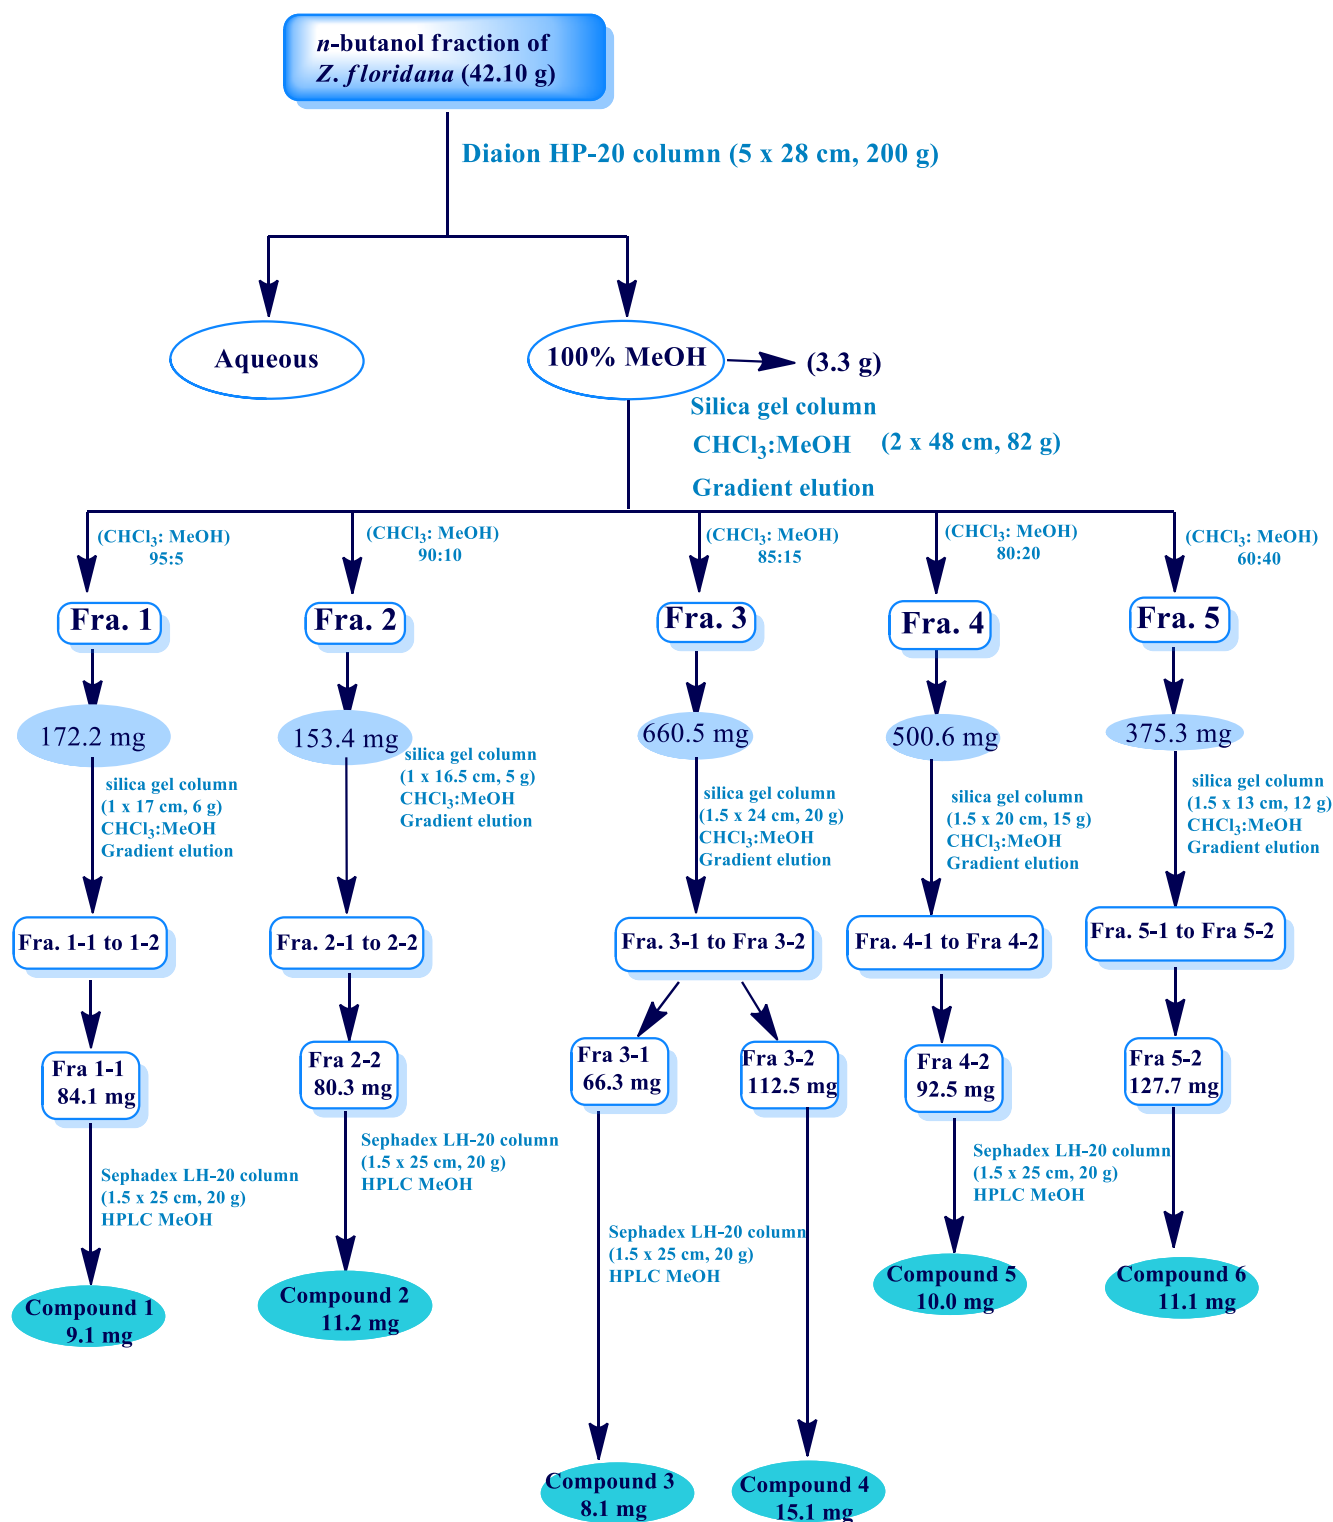

**Figure S2.** Isolation steps of six pure compounds from *Z. floridana* n-BuOH fraction

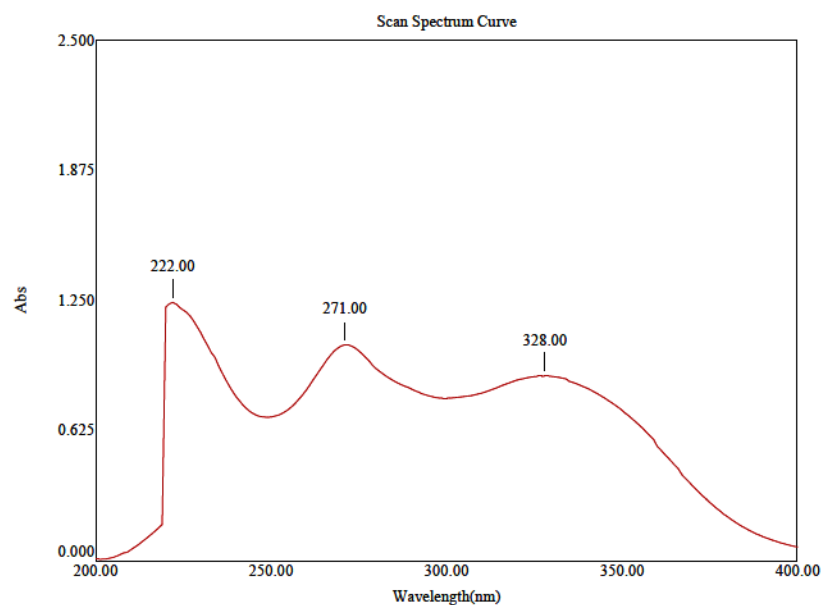

Figure S3. UV spectrum of compound (1) in MeOH

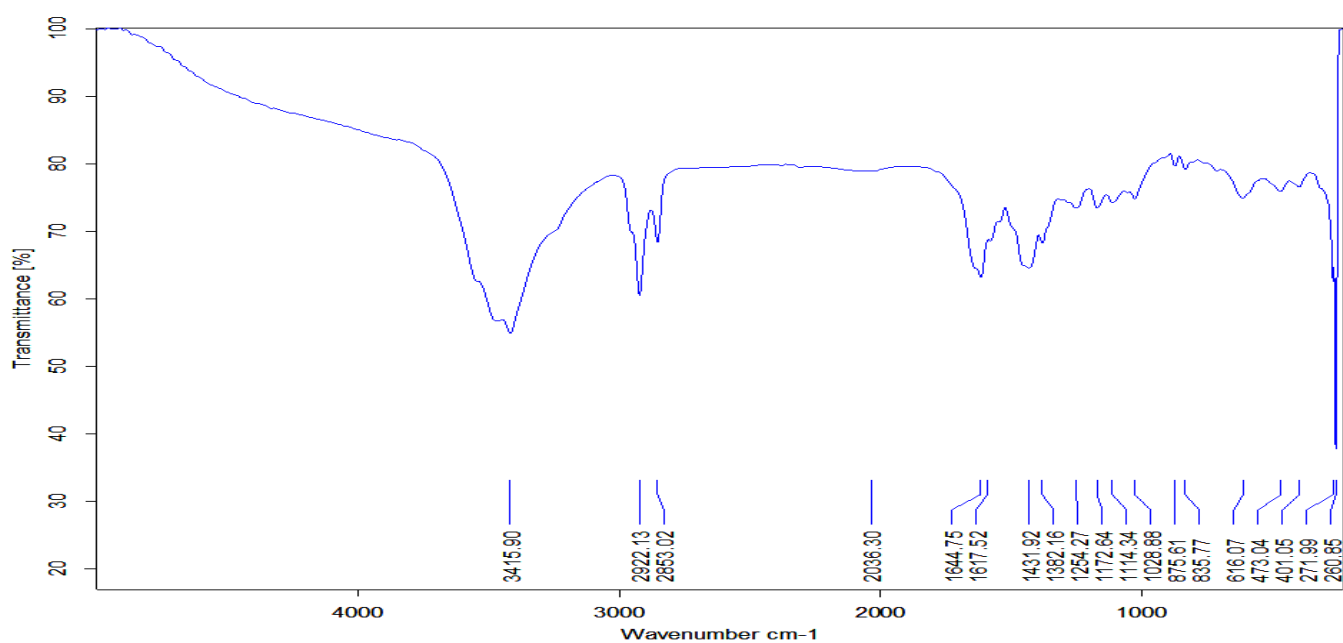

Figure S4. IR spectrum of compound (1) in KBr disc

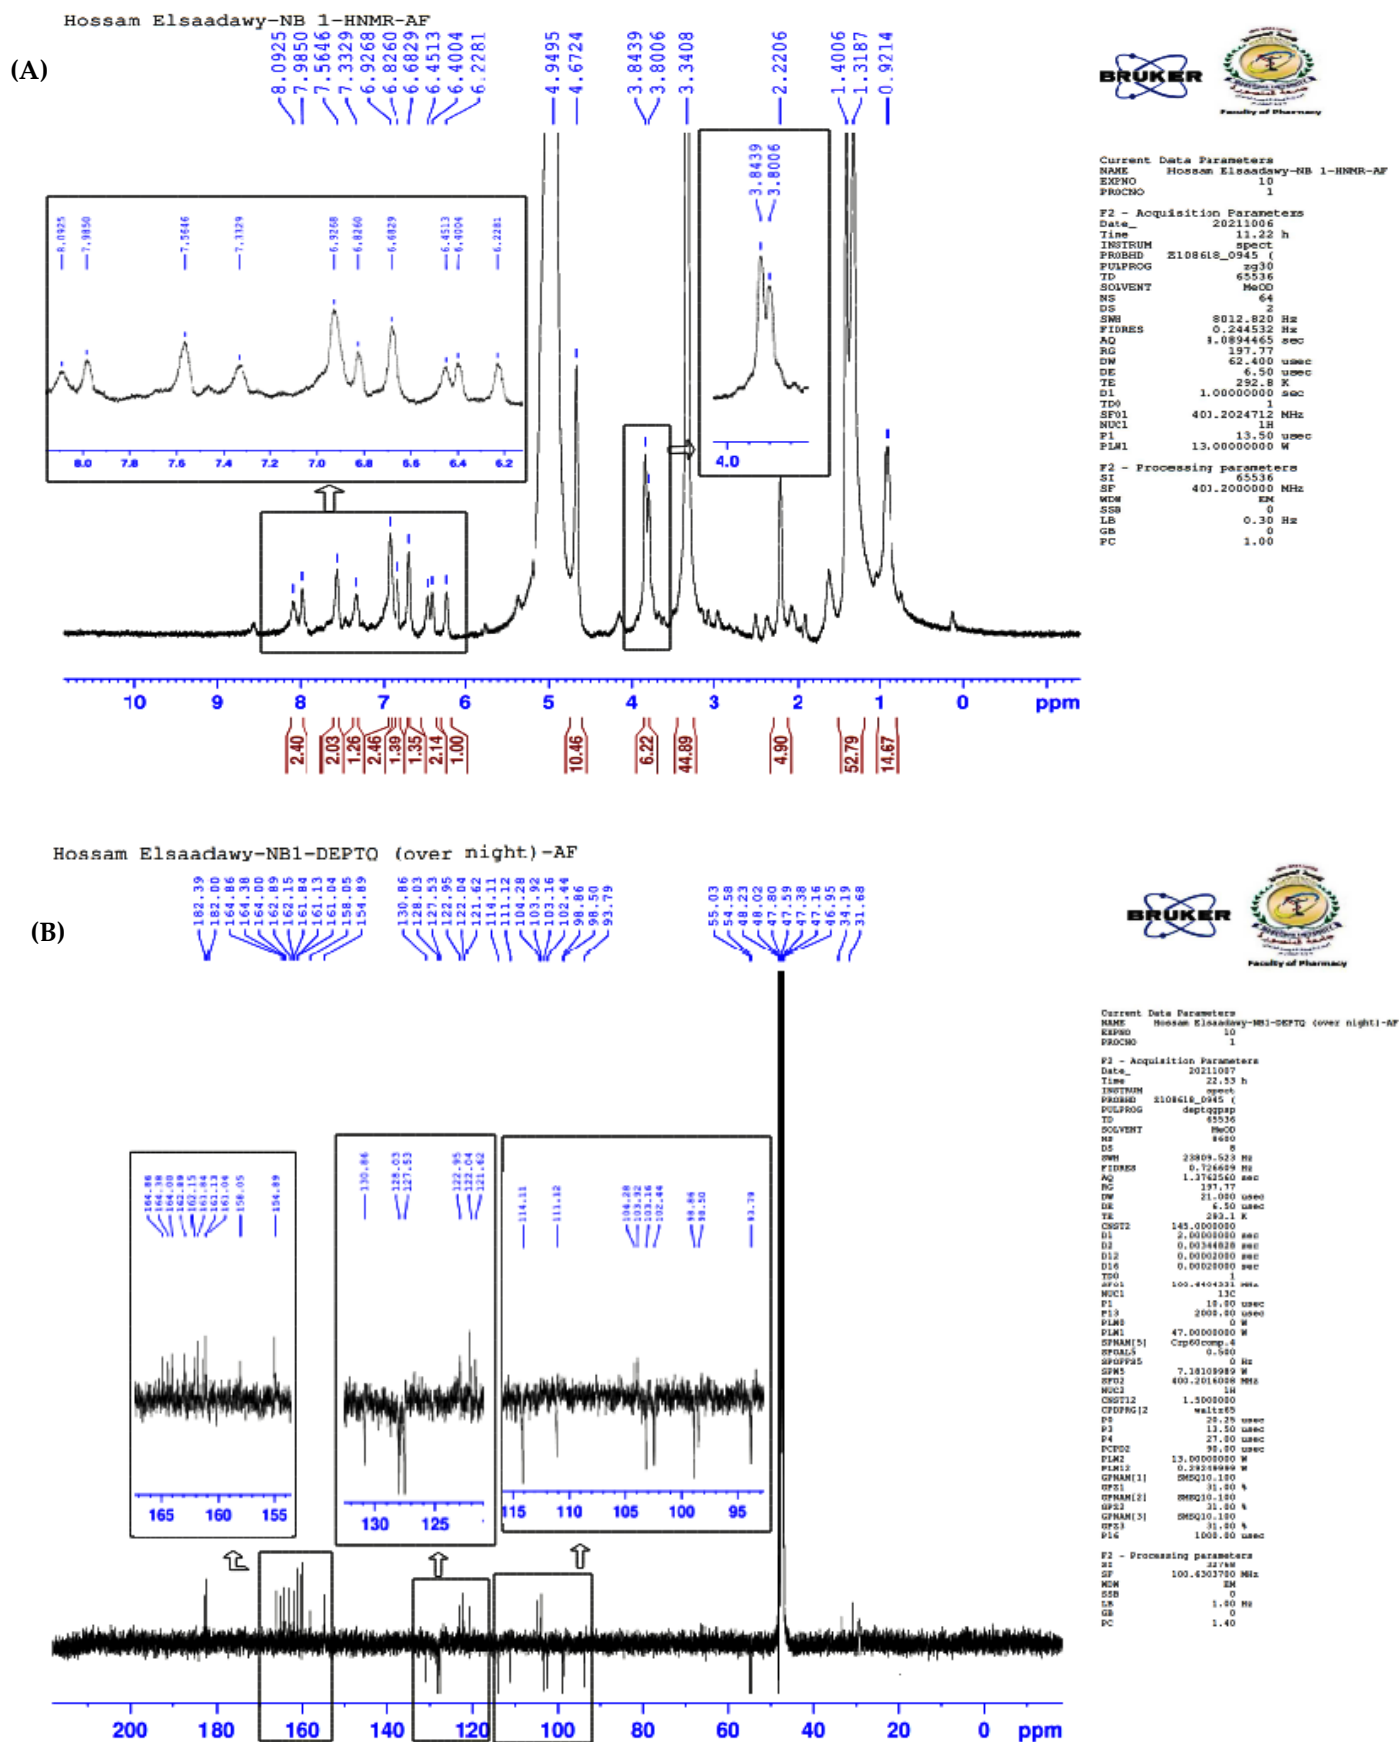

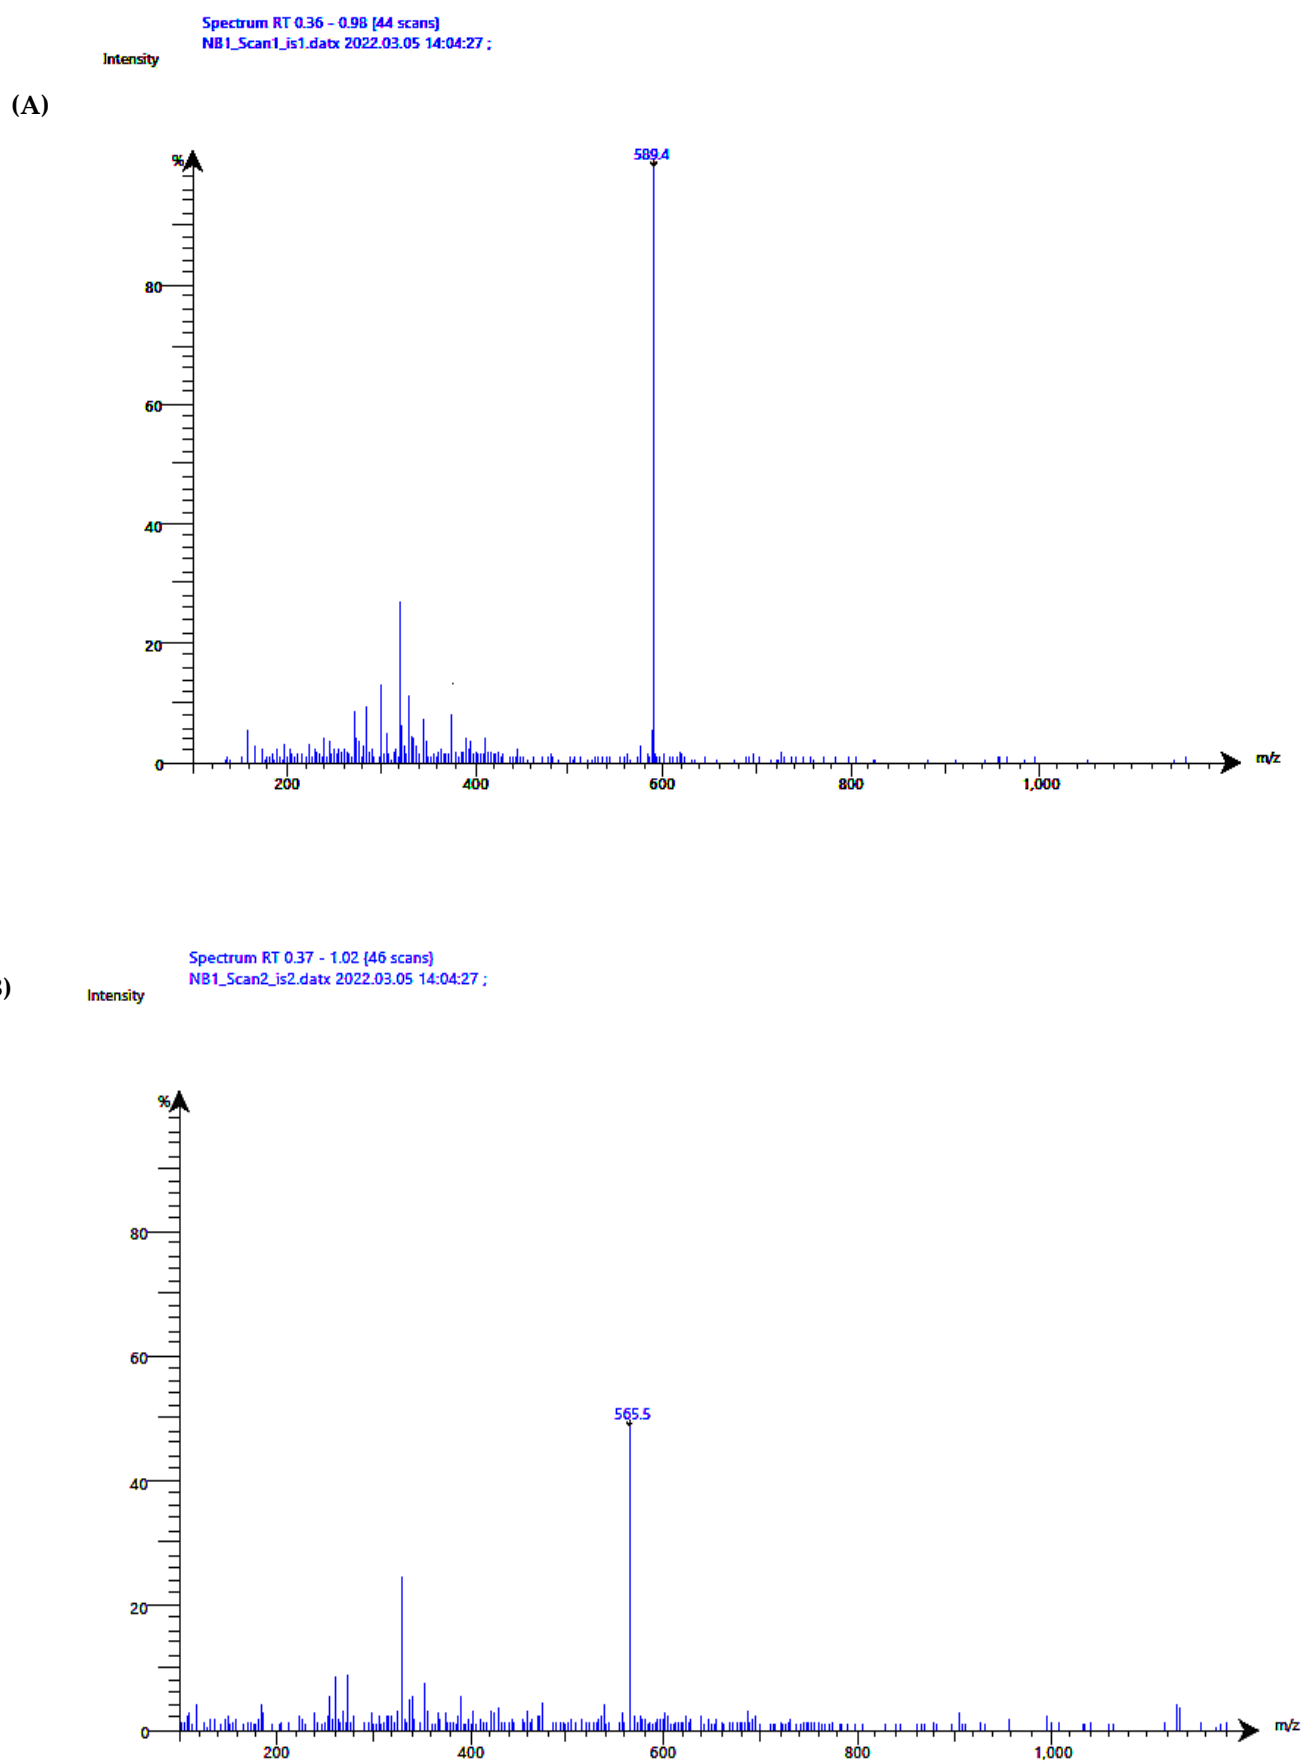

**Figure S6.** ESIMS "positive (A) and negative modes (B)" of compound (1)

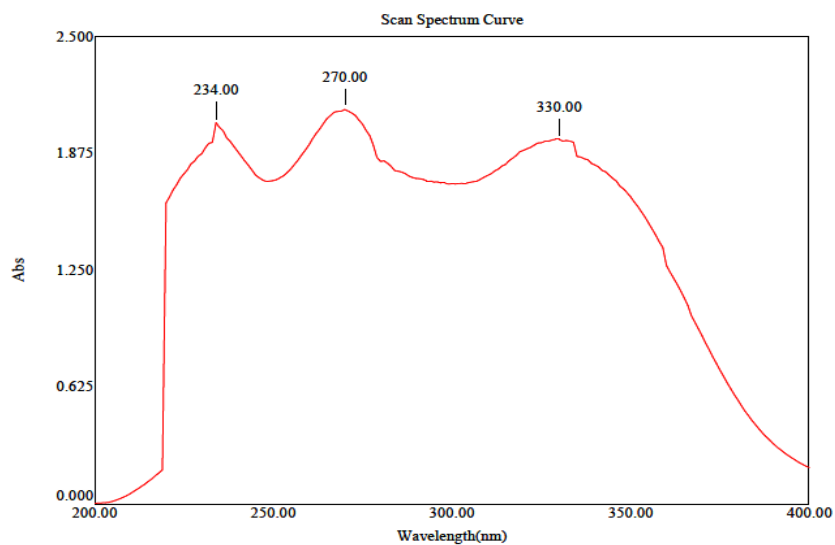

**Figure S7.** UV spectrum of compound (2) in MeOH

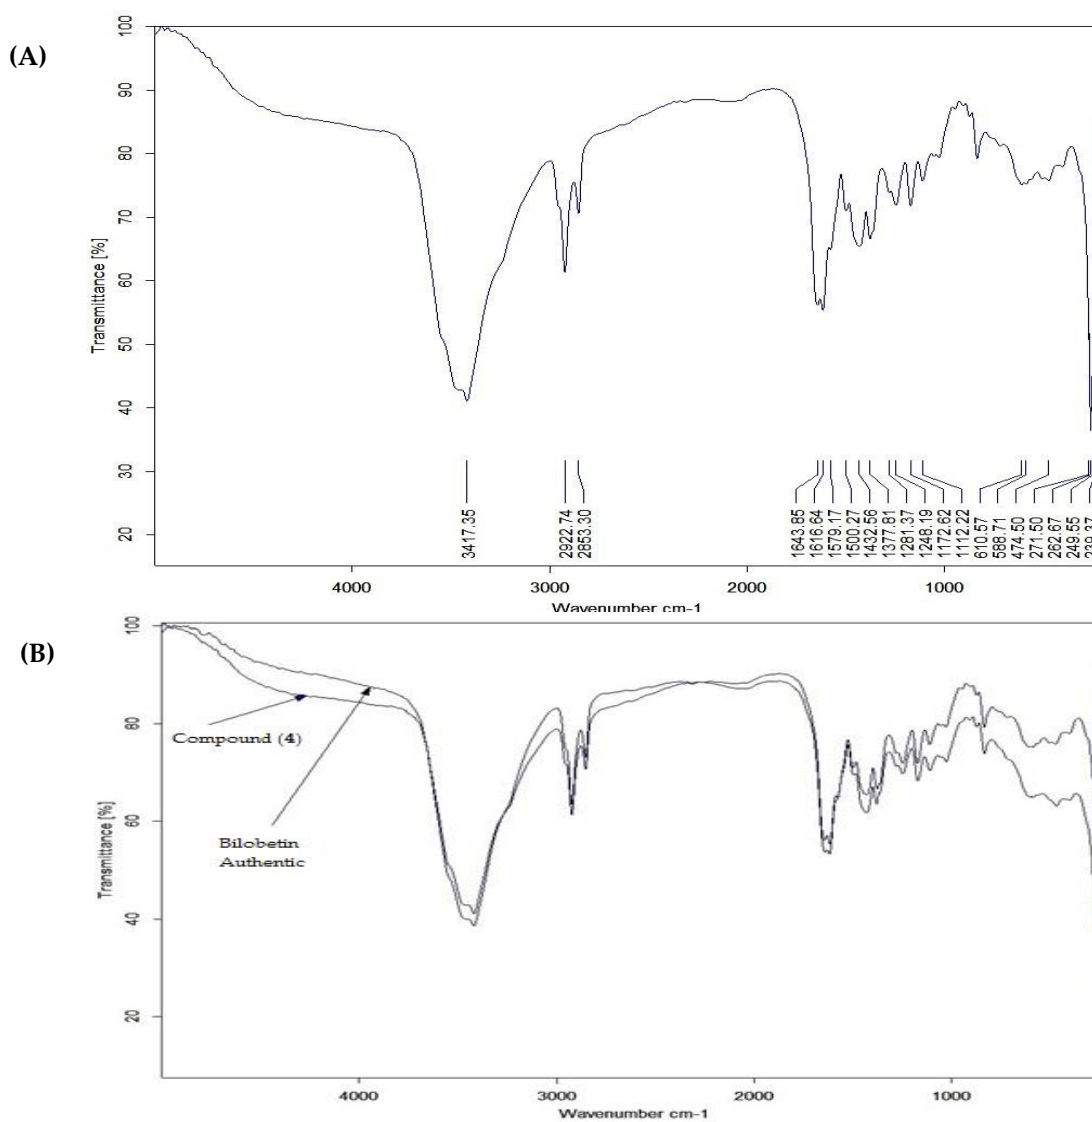

**Figure S8.** (A) IR spectrum of compound (2) in KBr disc  
(B) IR fingerprint spectrum of compound (2) and bilobetin authentic sample in KBr

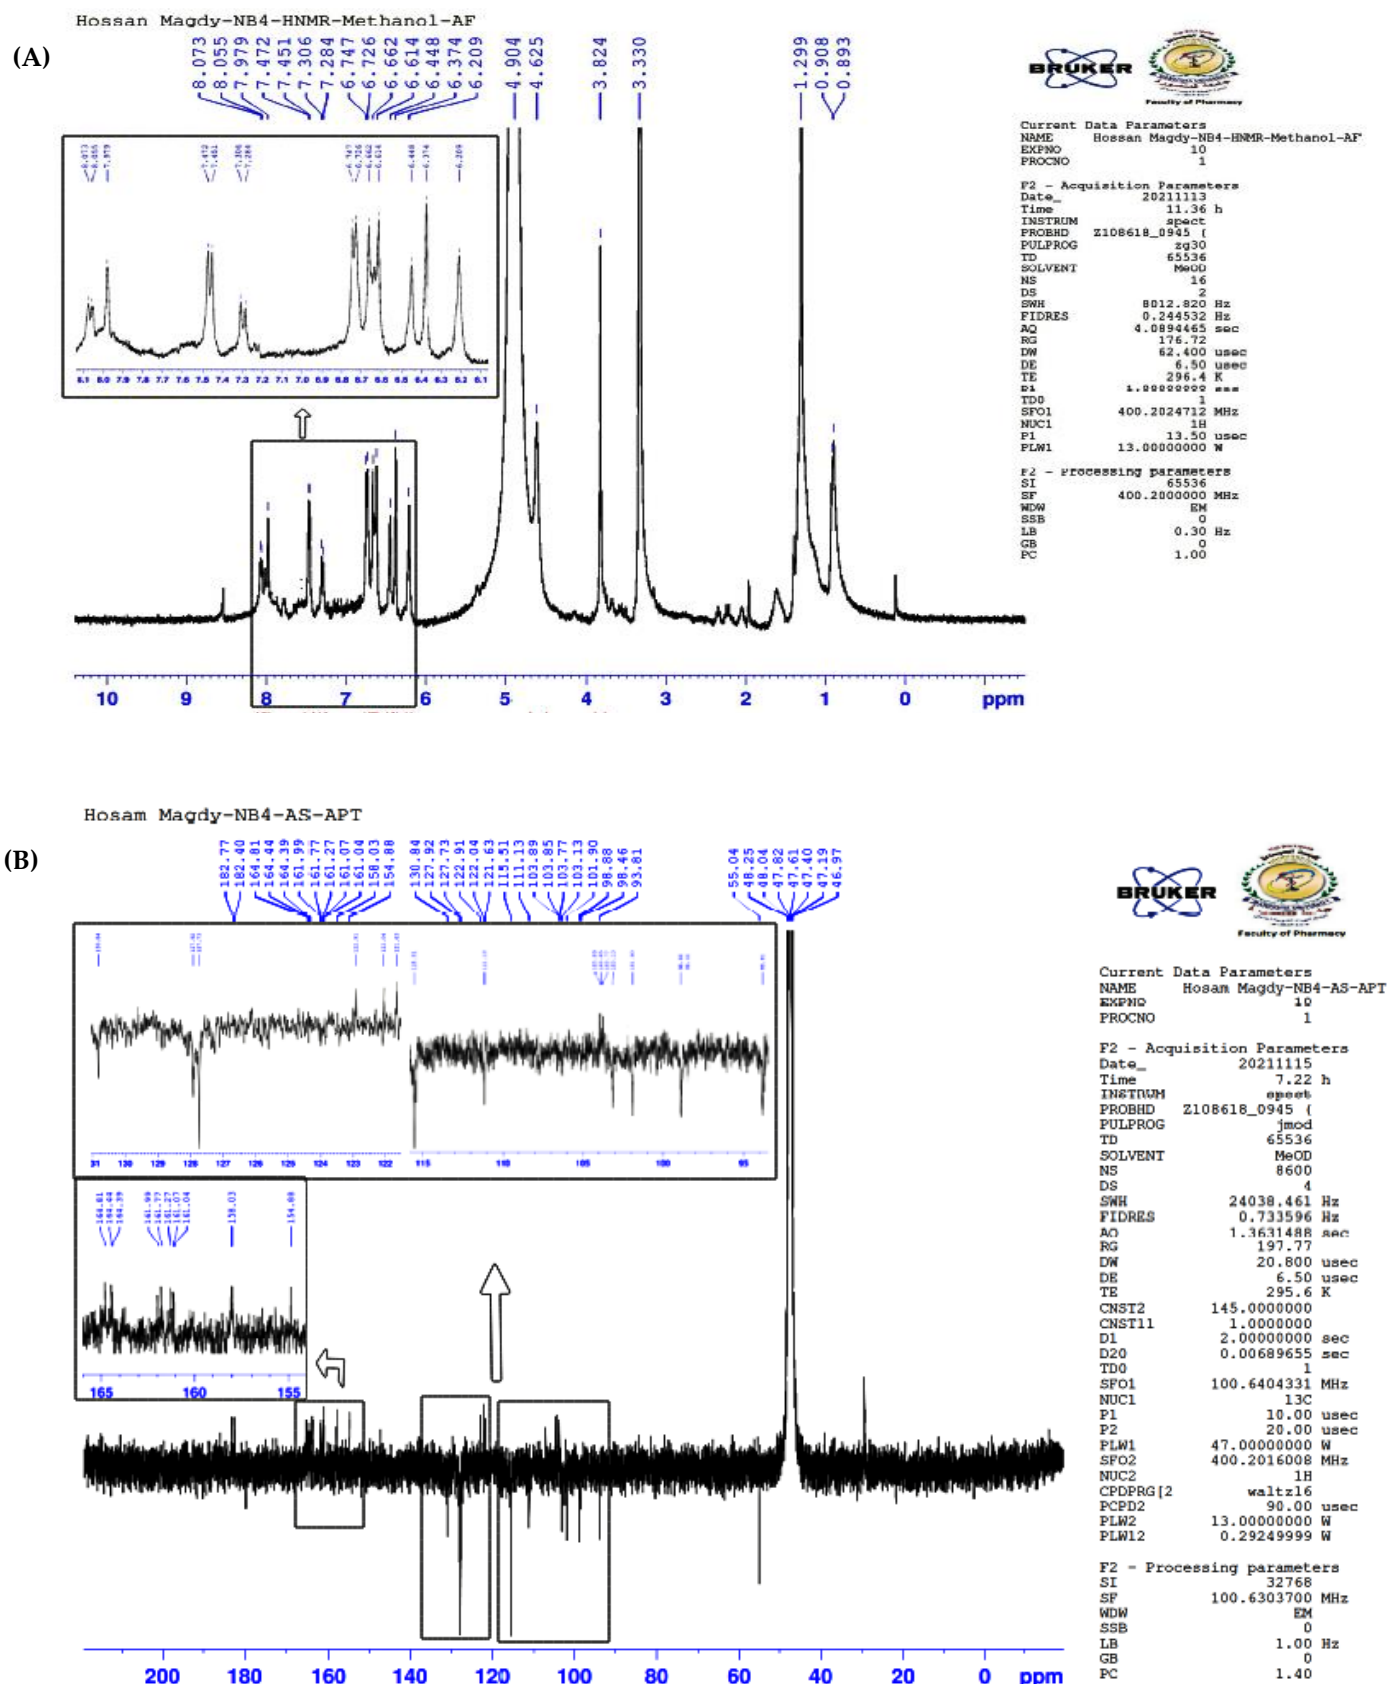Figure S9. (A)  $^1\text{H}$  and (B) APT NMR spectrum of compound (2) ( $\text{CD}_3\text{OD}$ )

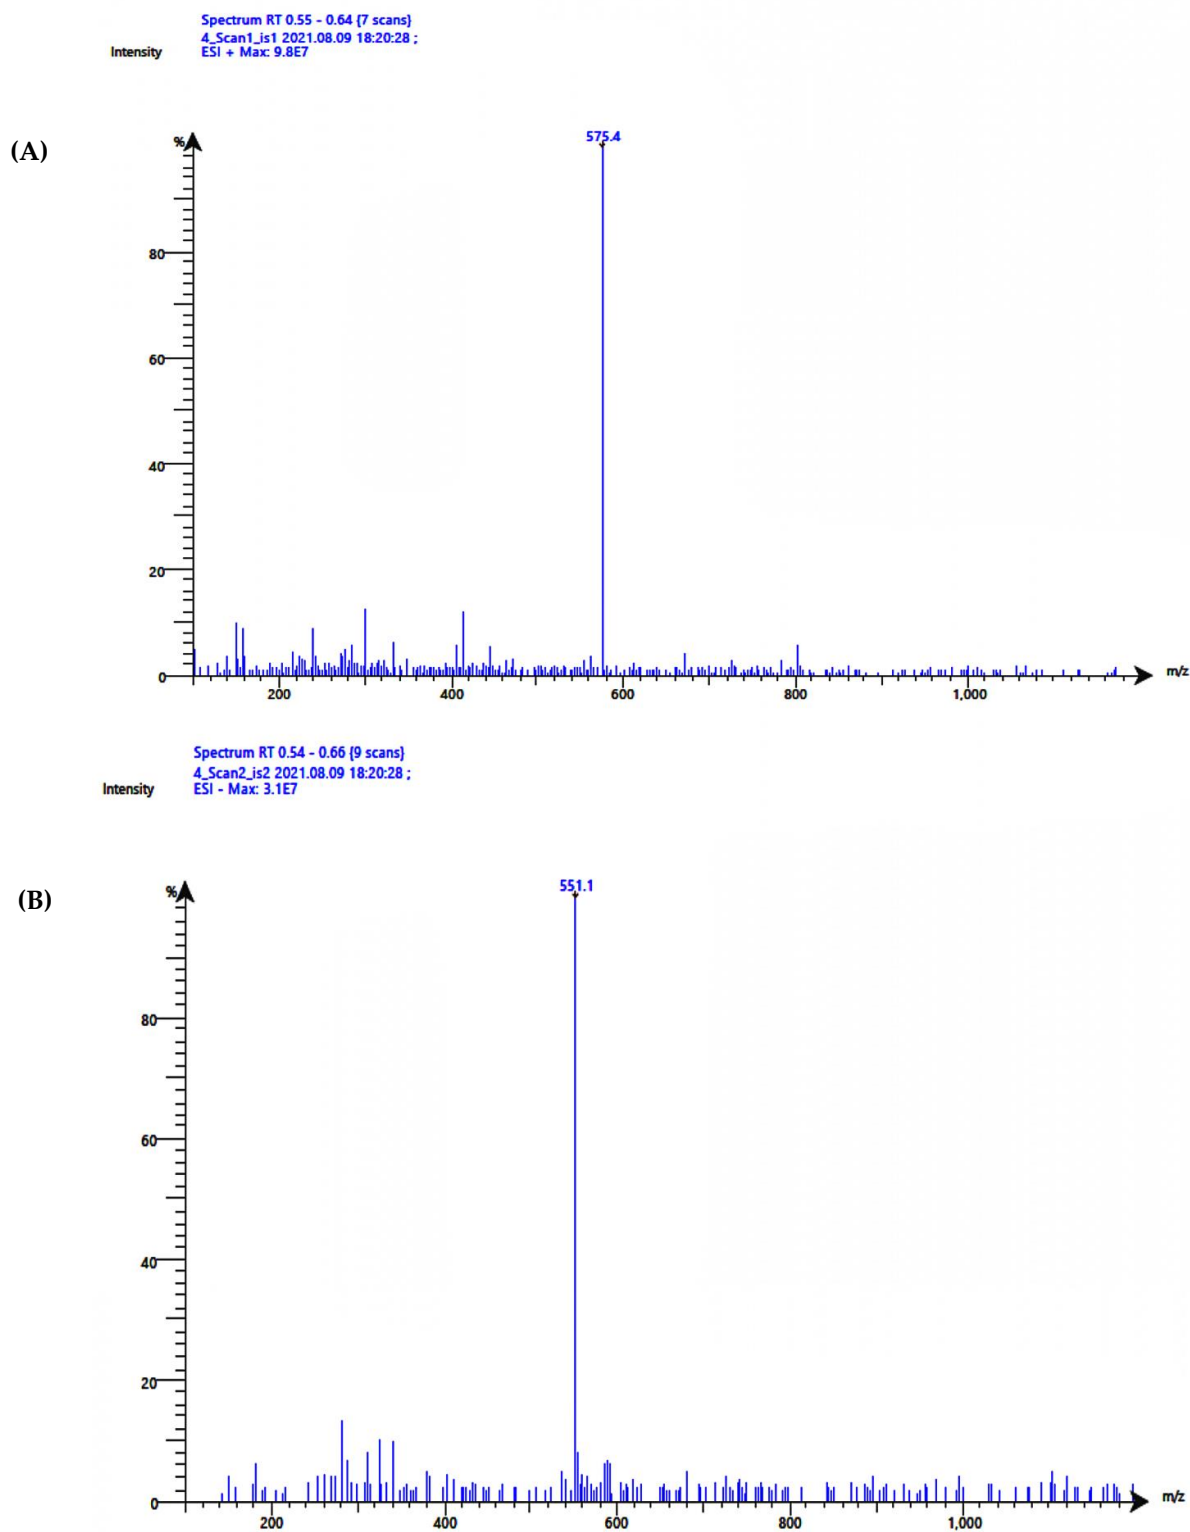

Figure S10. ESIMS "positive (A) and negative modes (B)" of compound (2)

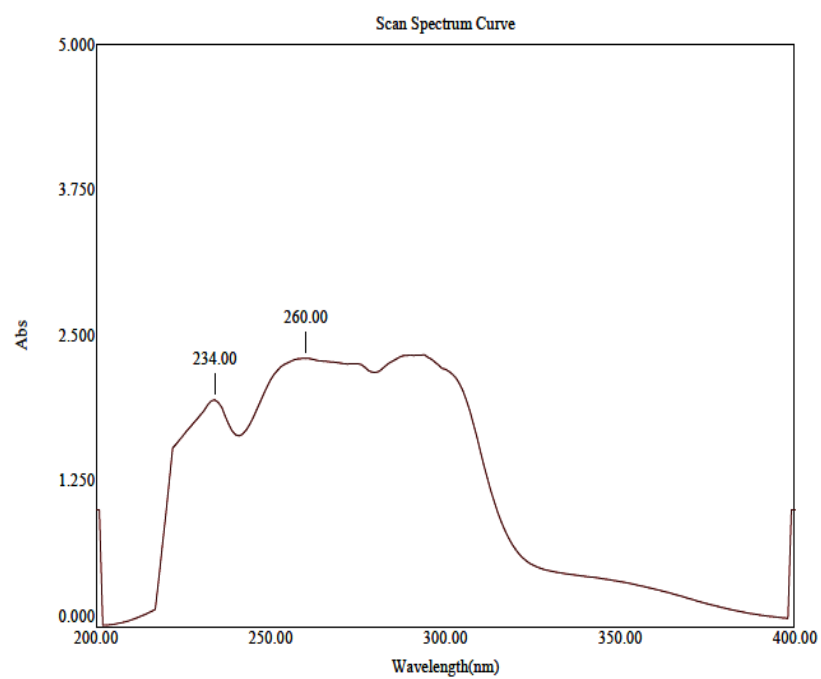

**Figure S11.** UV spectrum of compound (3) in MeOH

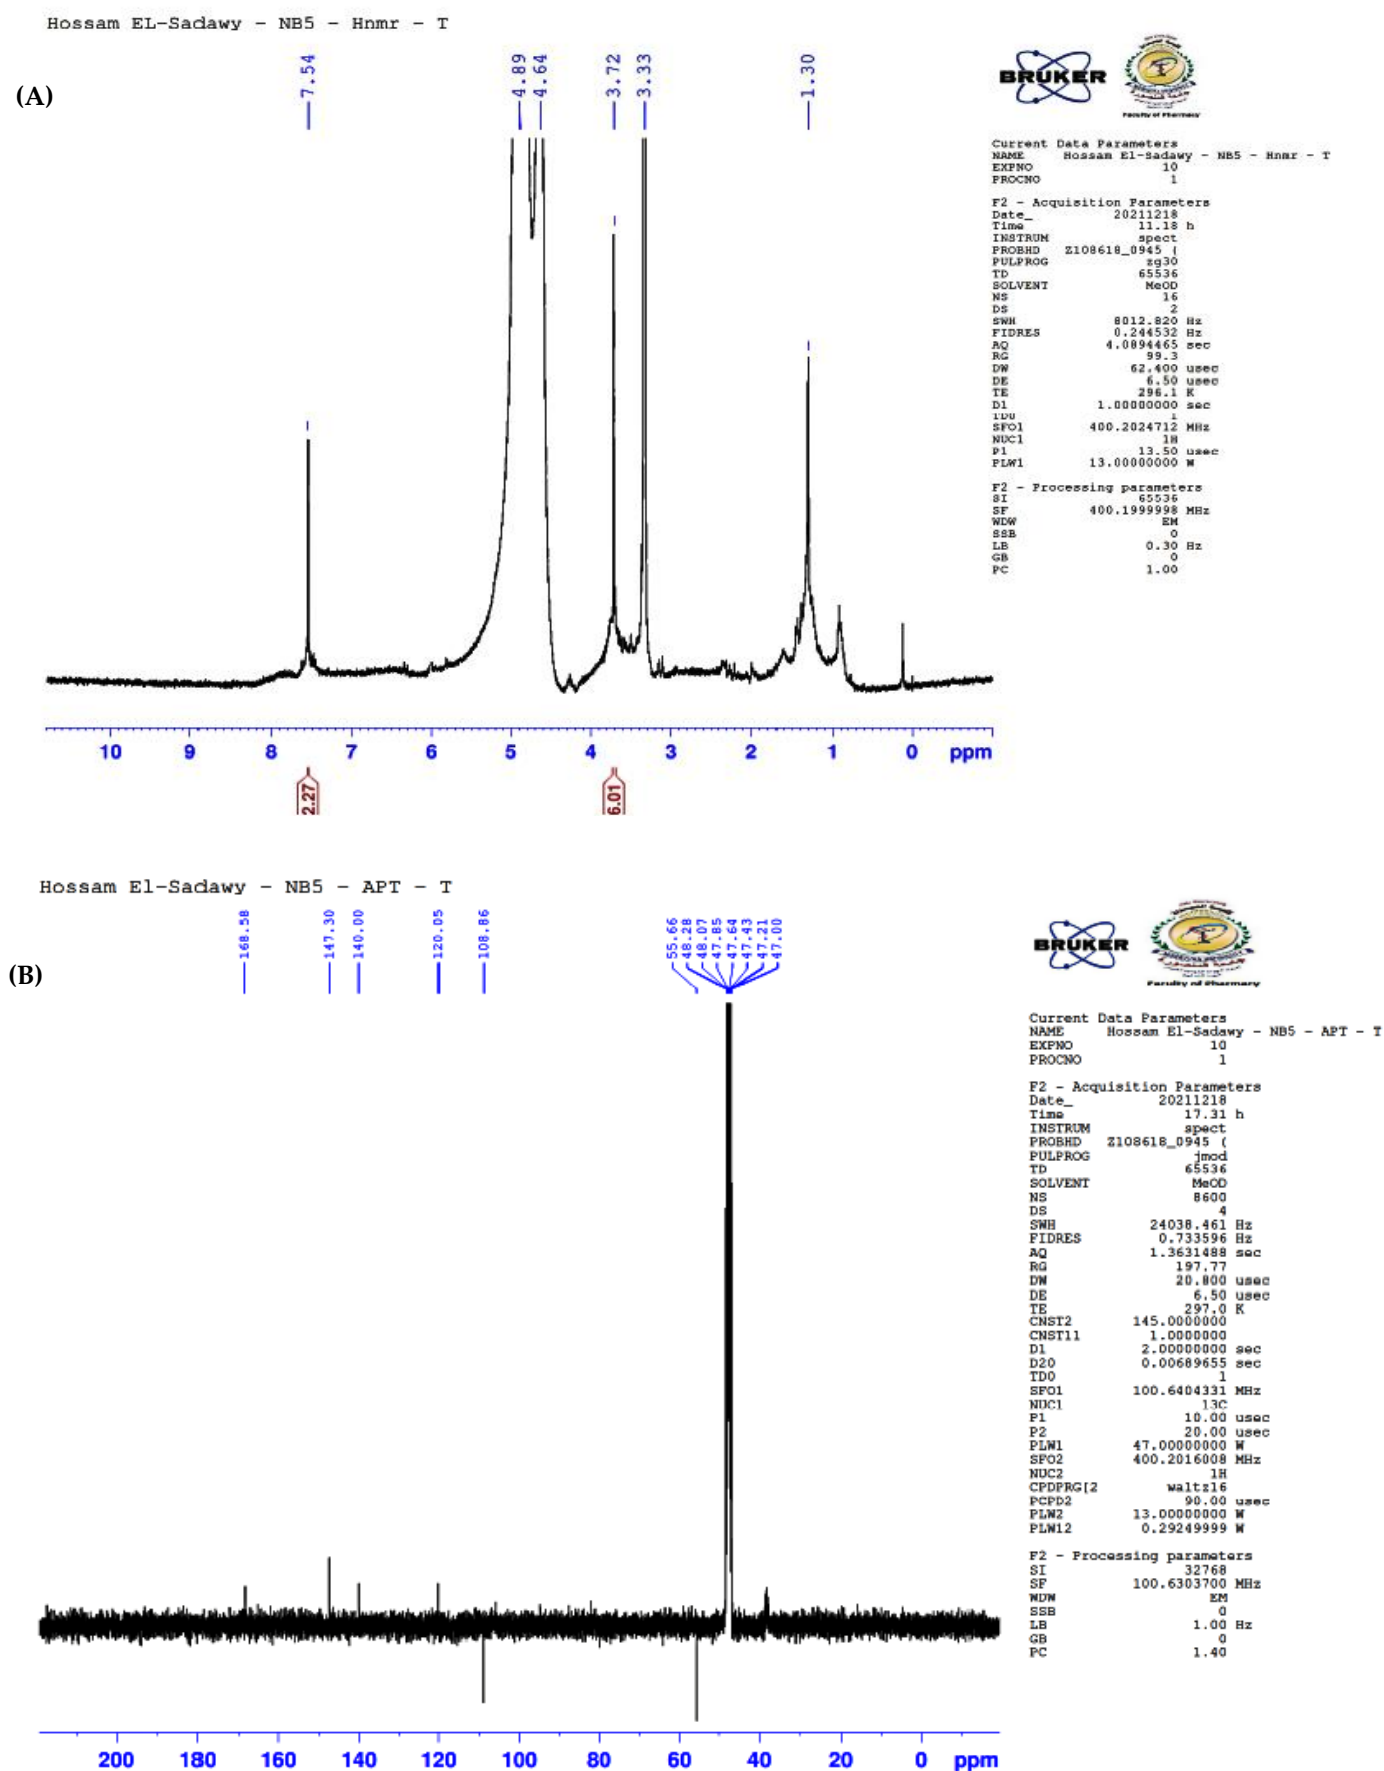Figure S12. (A)  $^1\text{H}$  and (B) APT NMR spectrum of compound (3) ( $\text{CD}_3\text{OD}$ )

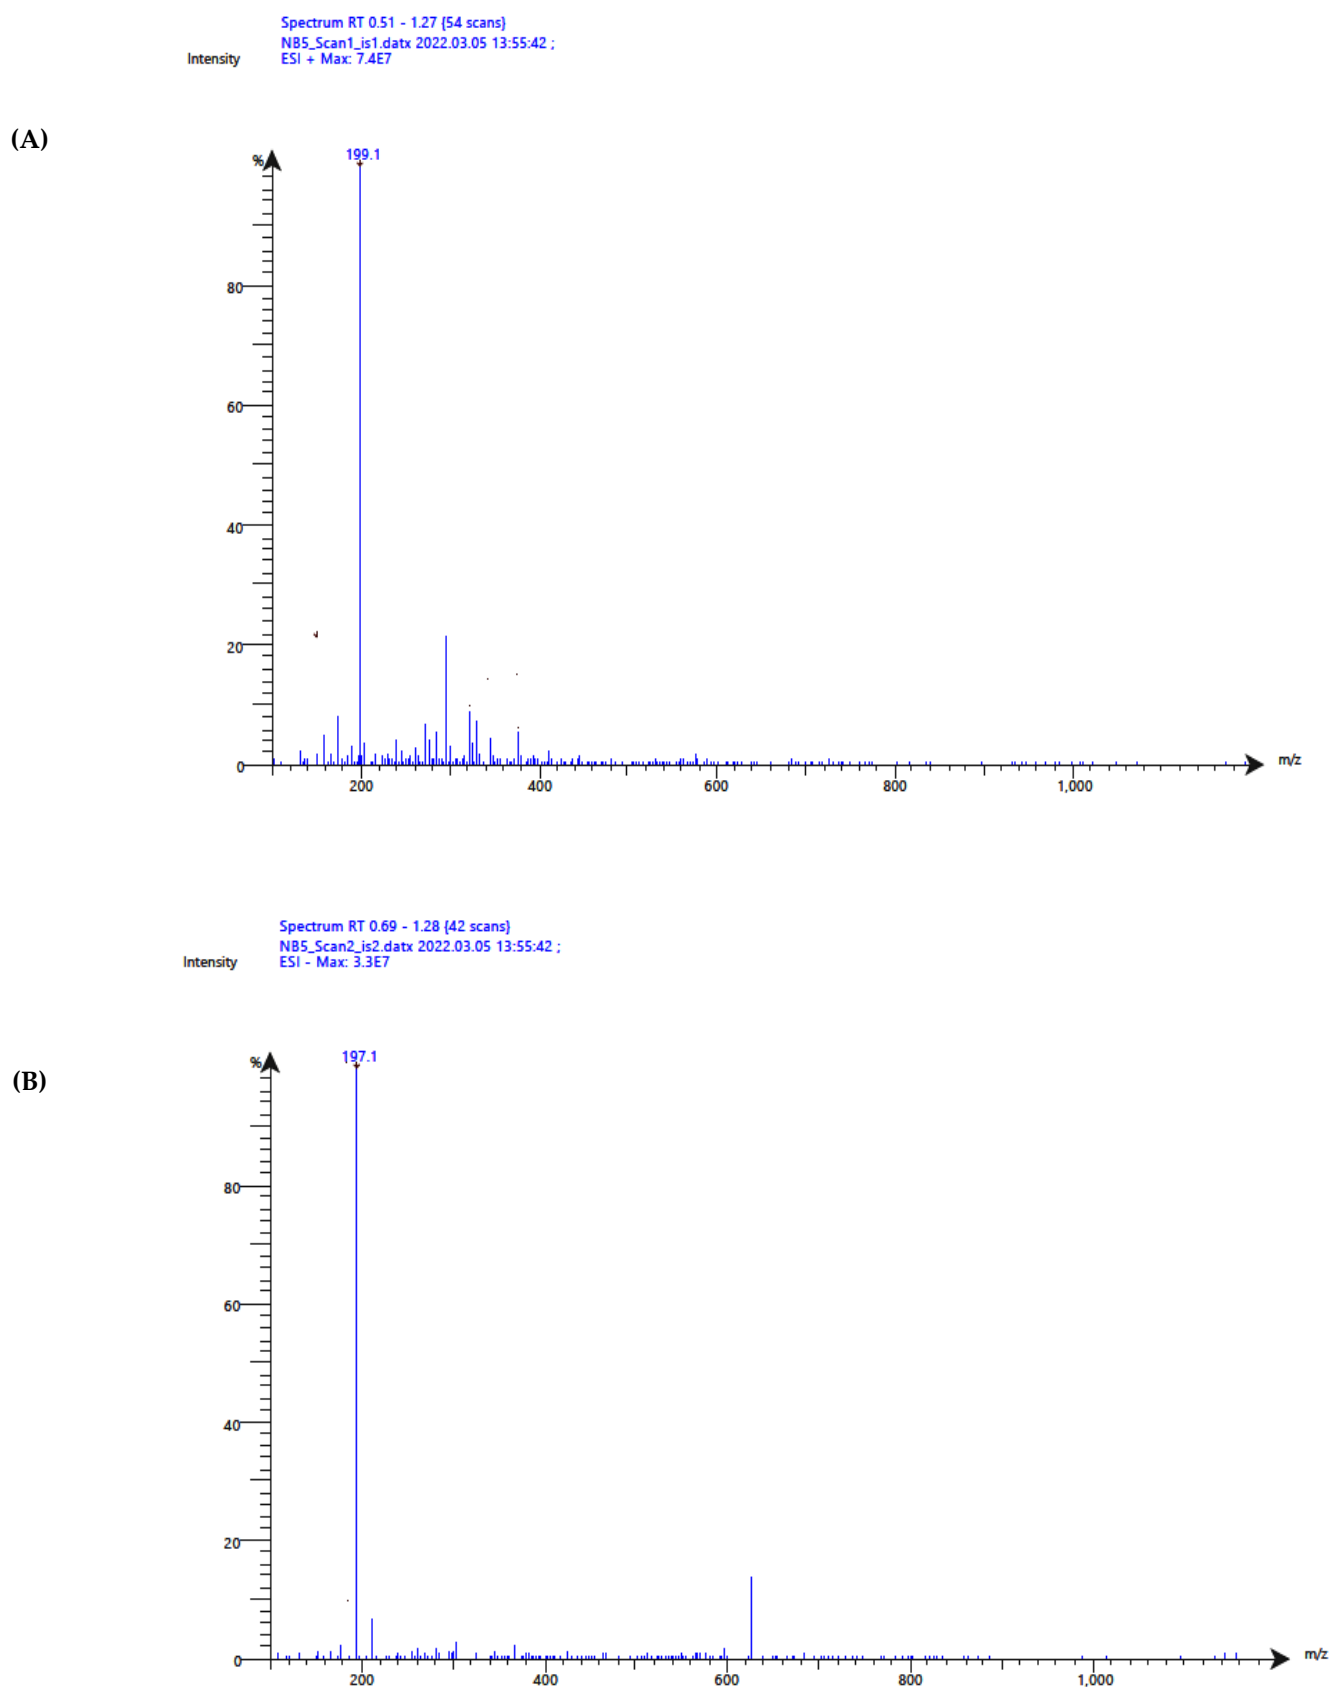

Figure S13. ESIMS "positive (A) and negative modes (B)" of compound (3)

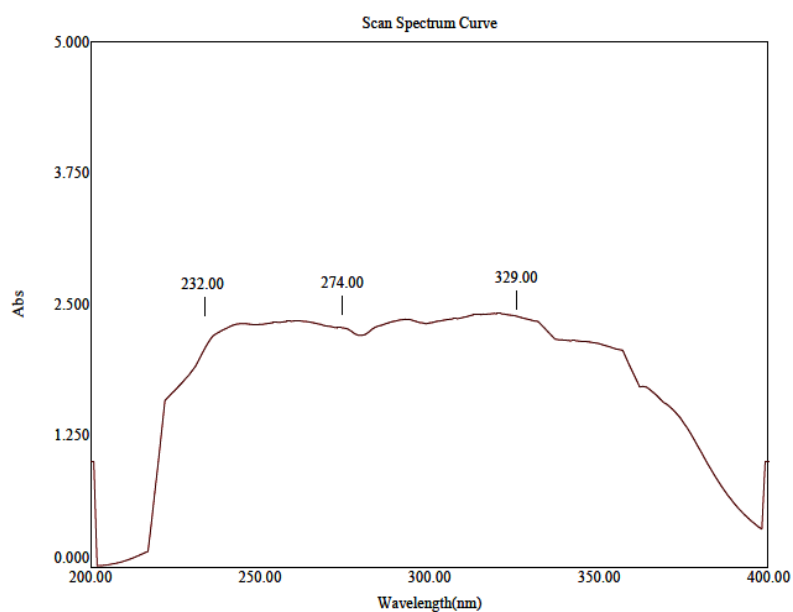

Figure S14. UV spectrum of compound (4) in MeOH

(A)

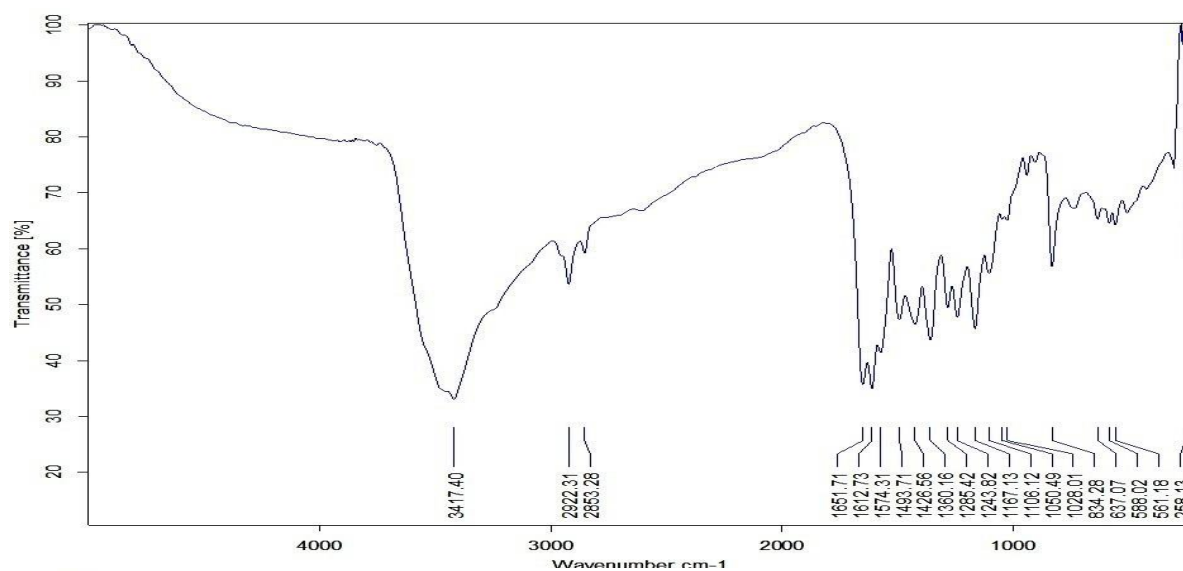

(B)

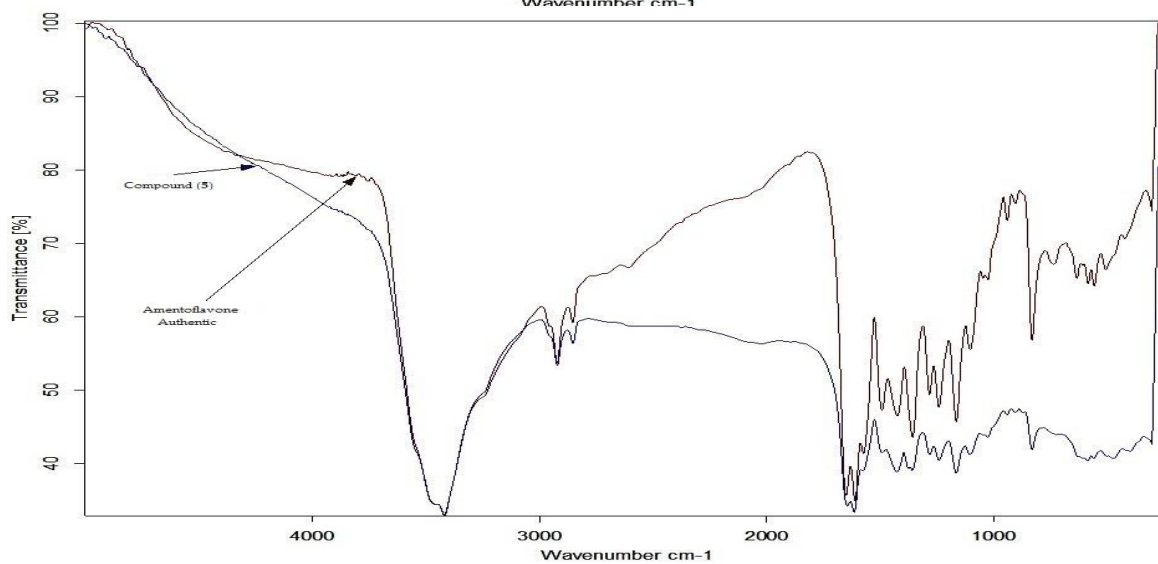

Figure S15. (A) IR spectrum of compound (4) in KBr disc

(B) IR fingerprint spectrum of compound (4) and Amentoflavone authentic sample in KBr disc

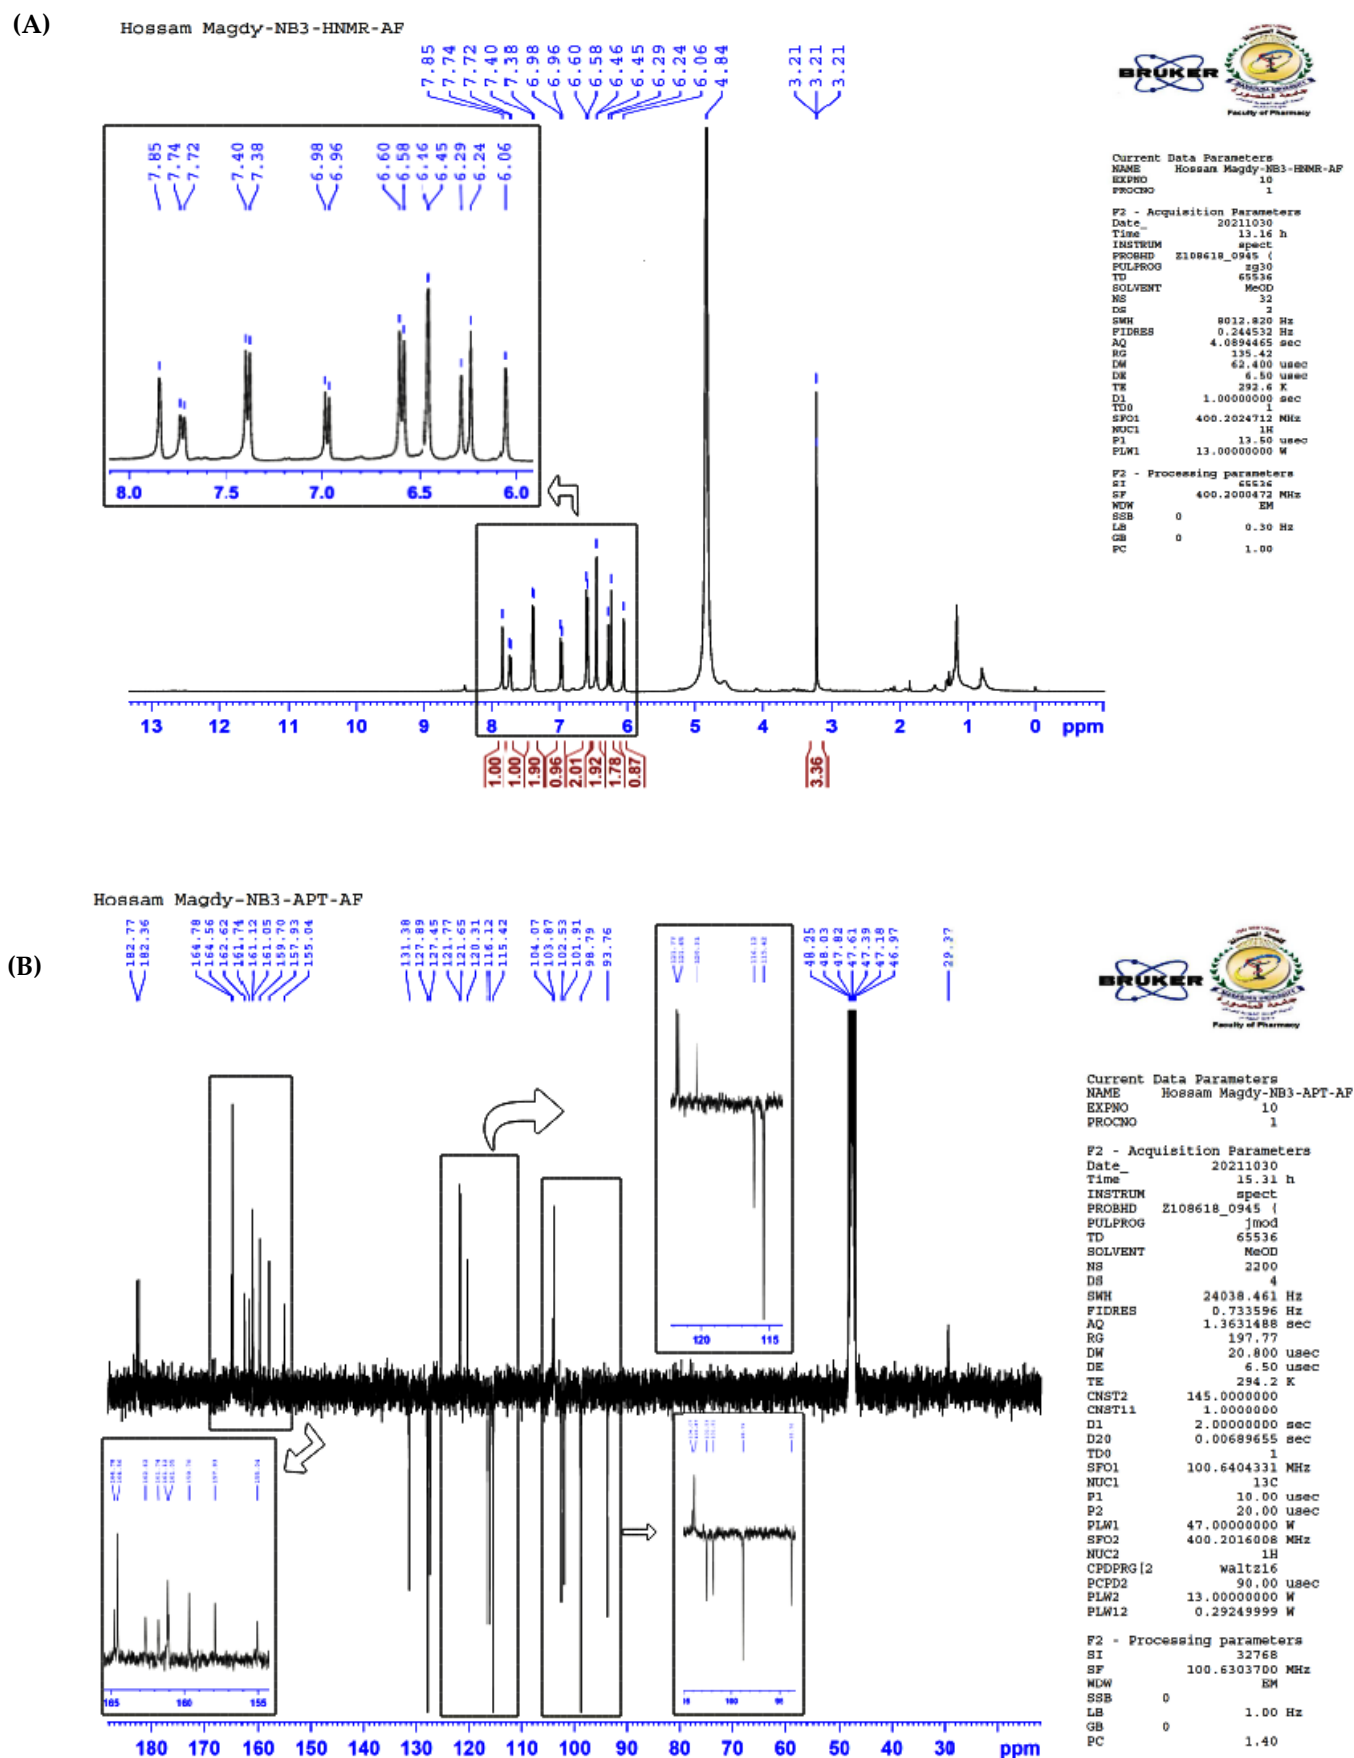Figure S16. (A)  $^1\text{H}$  and (B) APT NMR spectrum of compound (4) ( $\text{CD}_3\text{OD}$ )

(A)

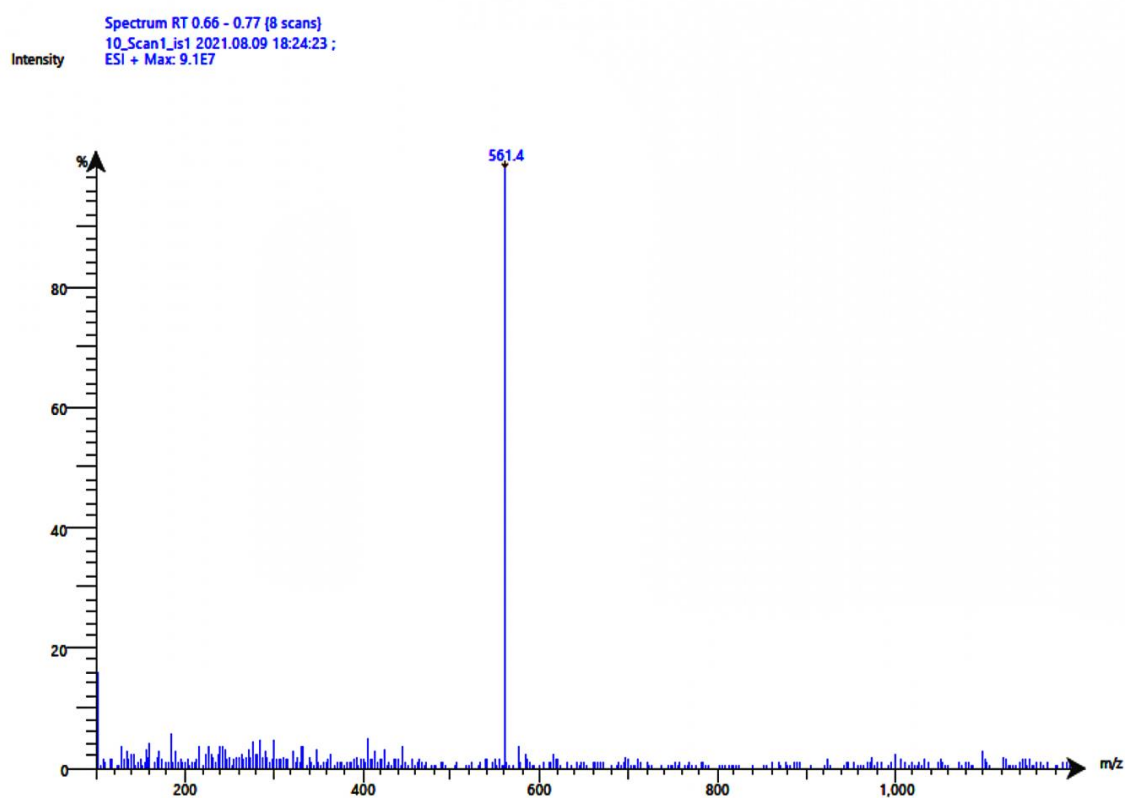

(B)

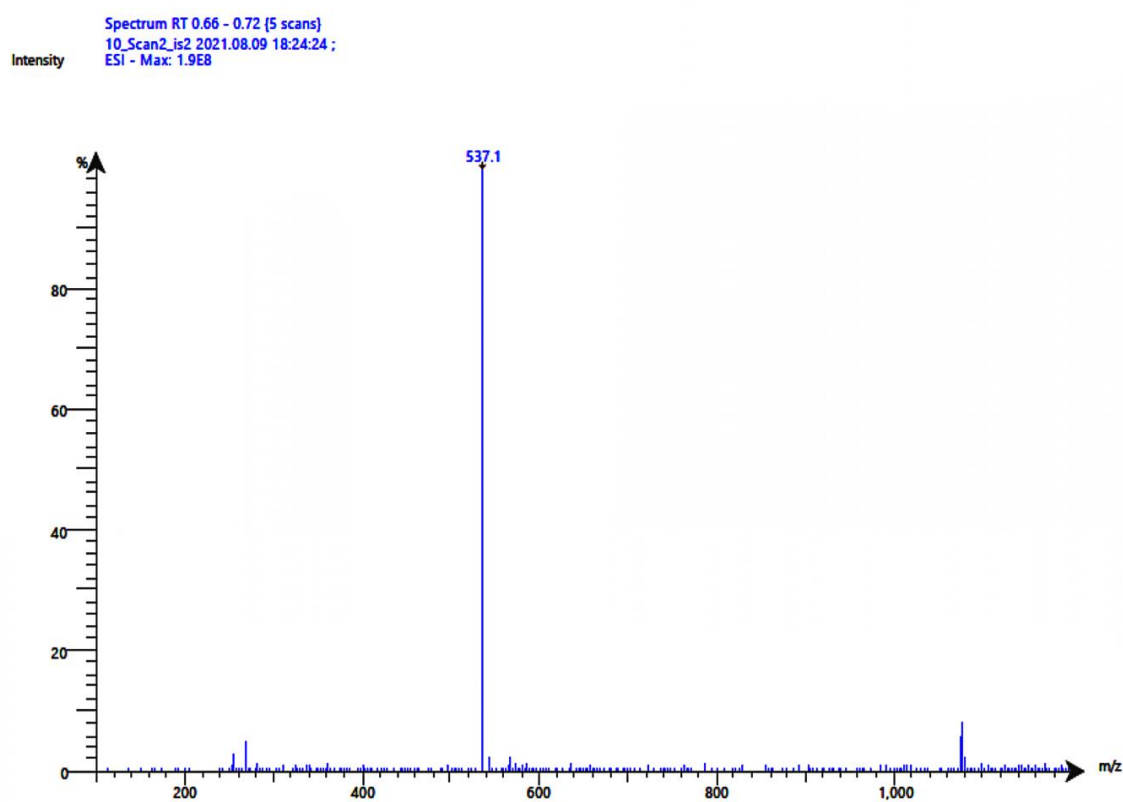

Figure S17. ESIMS "positive (A) and negative modes (B)" of compound (4)

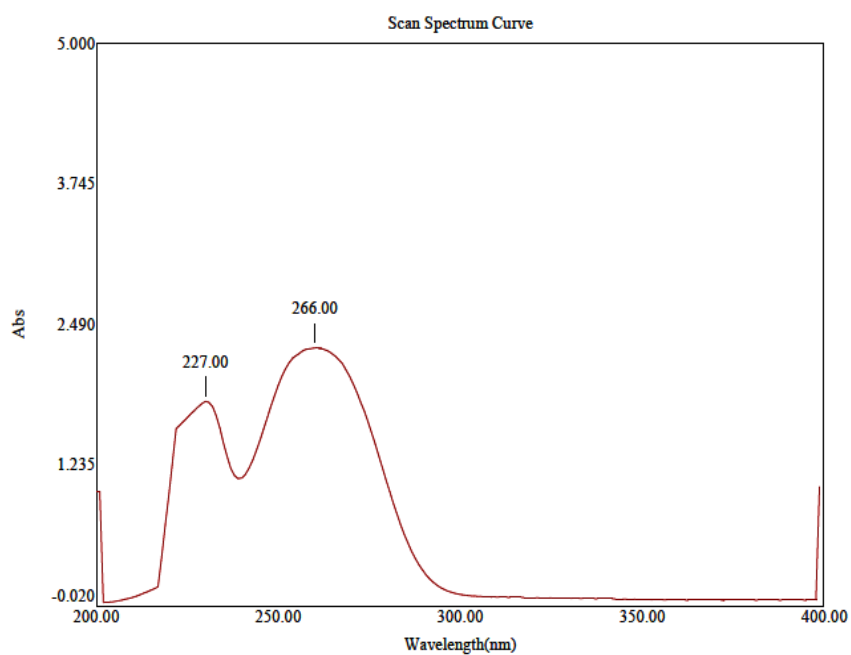

Figure S18. UV spectrum of compound (5) in MeOH

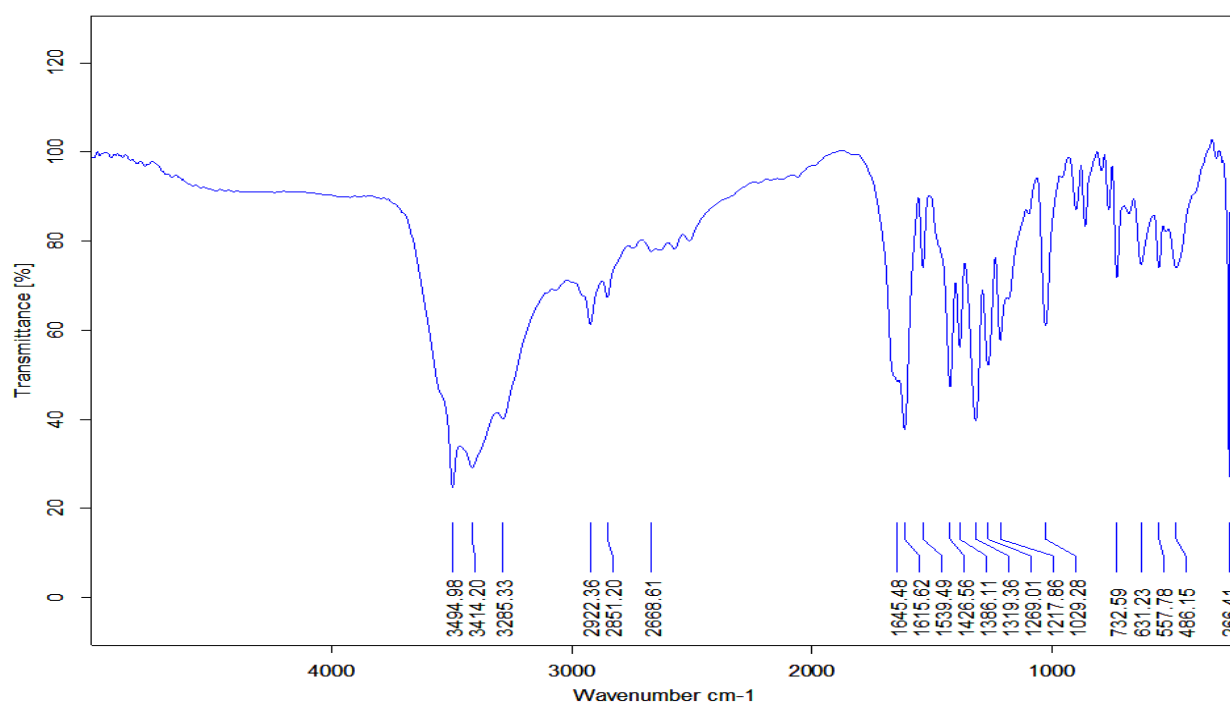

Figure S19. IR spectrum of compound (5) in KBr disc

## (A) Hosam Magdy-NB6-Methanol-AF

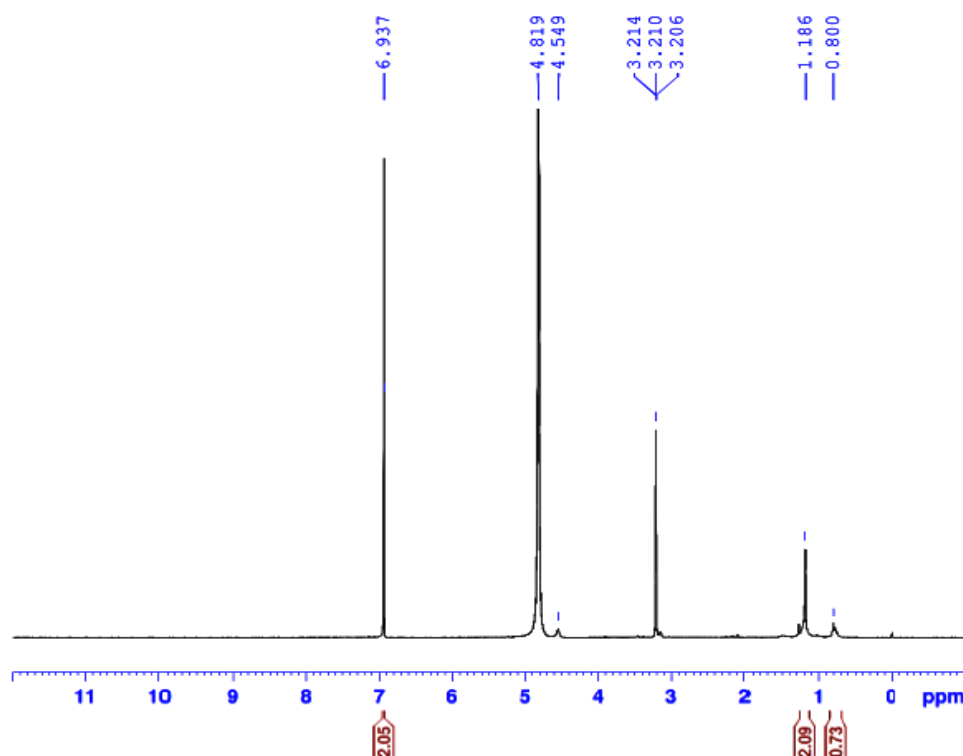

## (B)

Hossam Magdy-NB6-APT-Methanol-AF

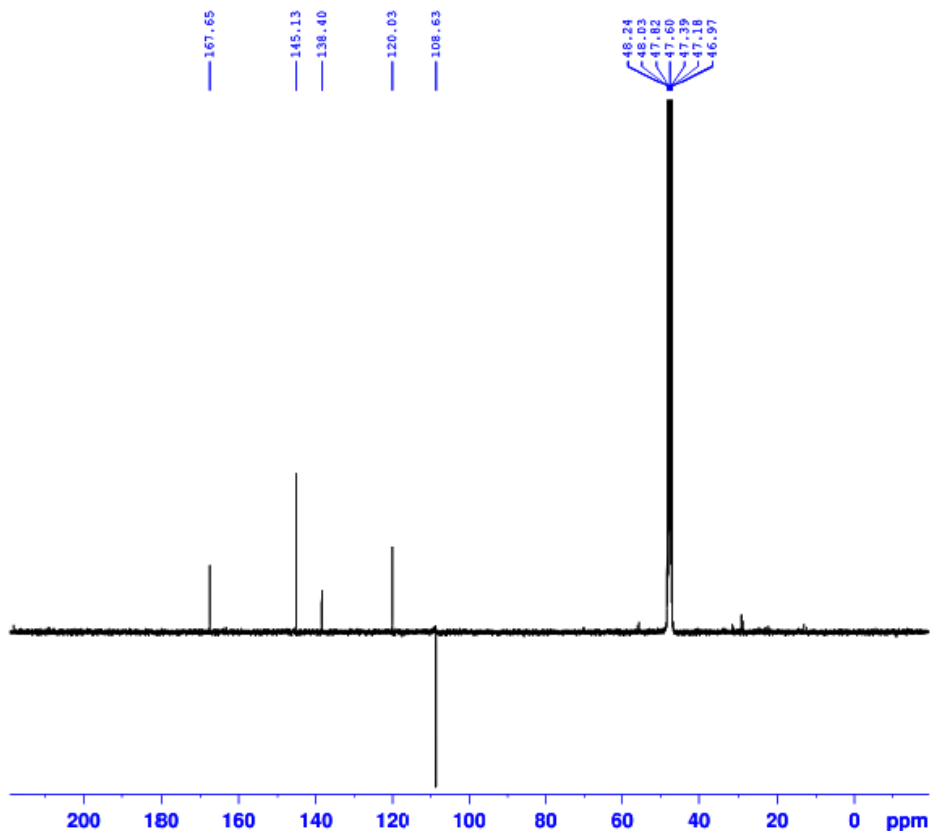Figure S20. (A)  $^1\text{H}$  and (B) APT NMR spectrum of compound (5) ( $\text{CD}_3\text{OD}$ )

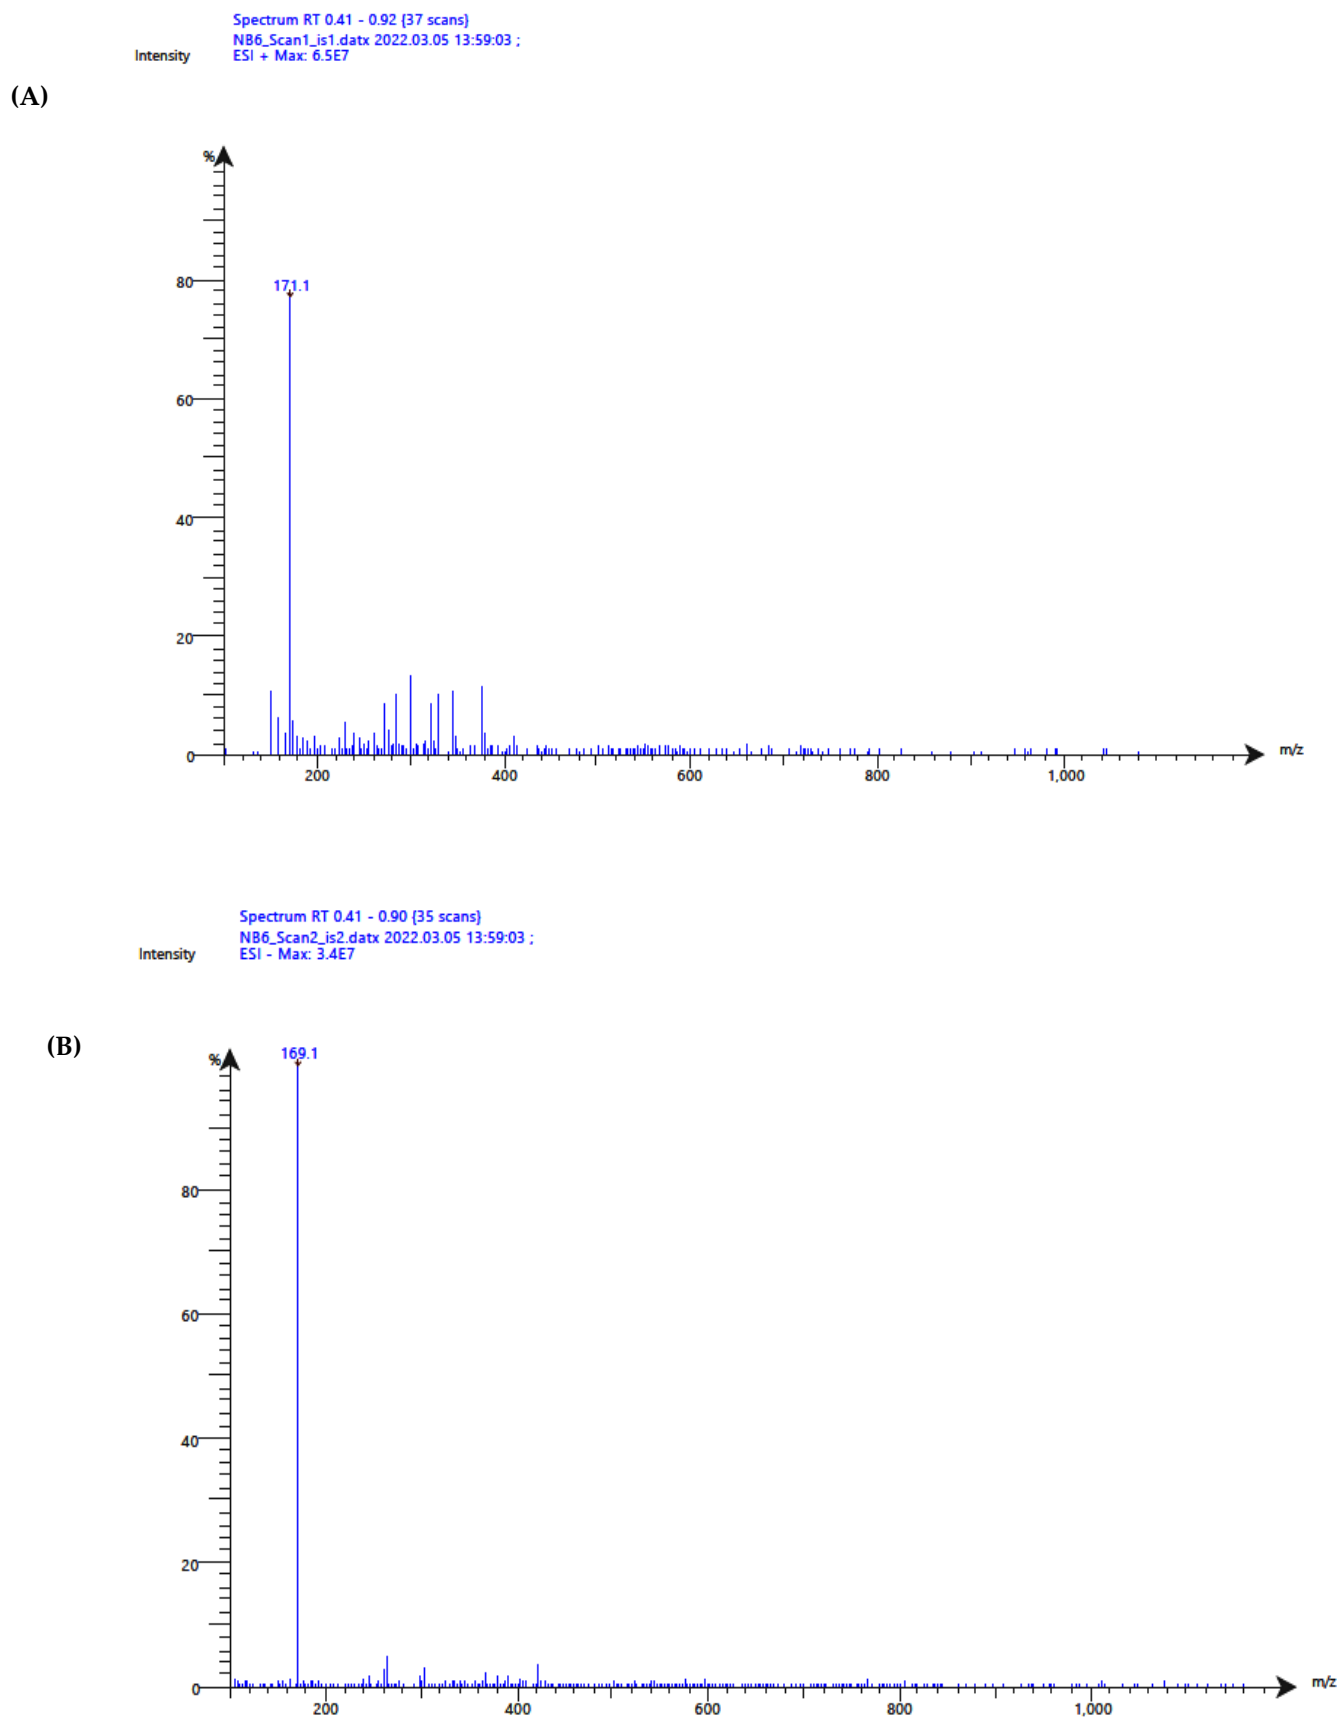

**Figure S21.** ESIMS "positive (A) and negative modes (B)" of compound (5)

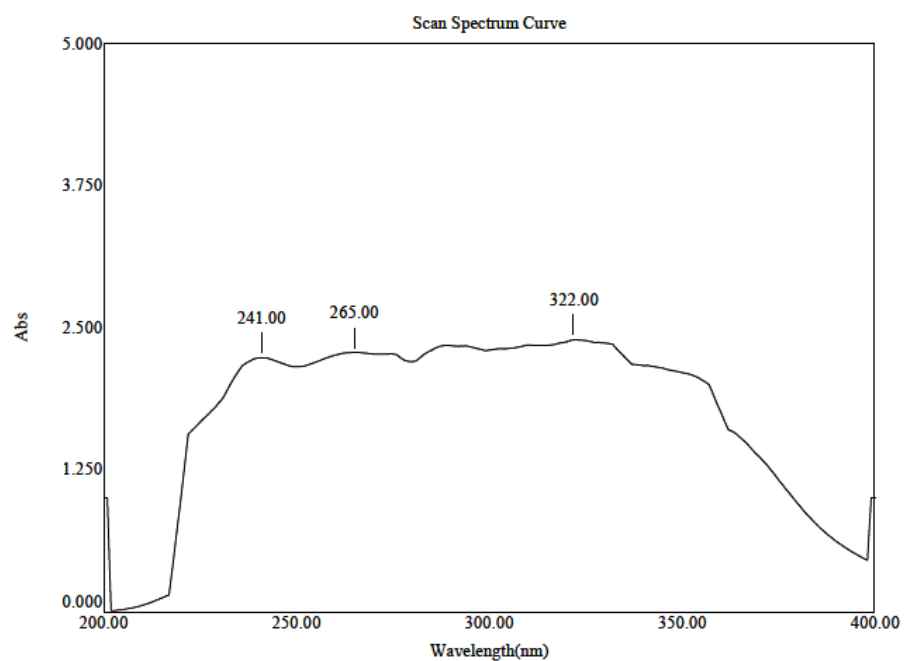

Figure S22. UV spectrum of compound (6) in MeOH

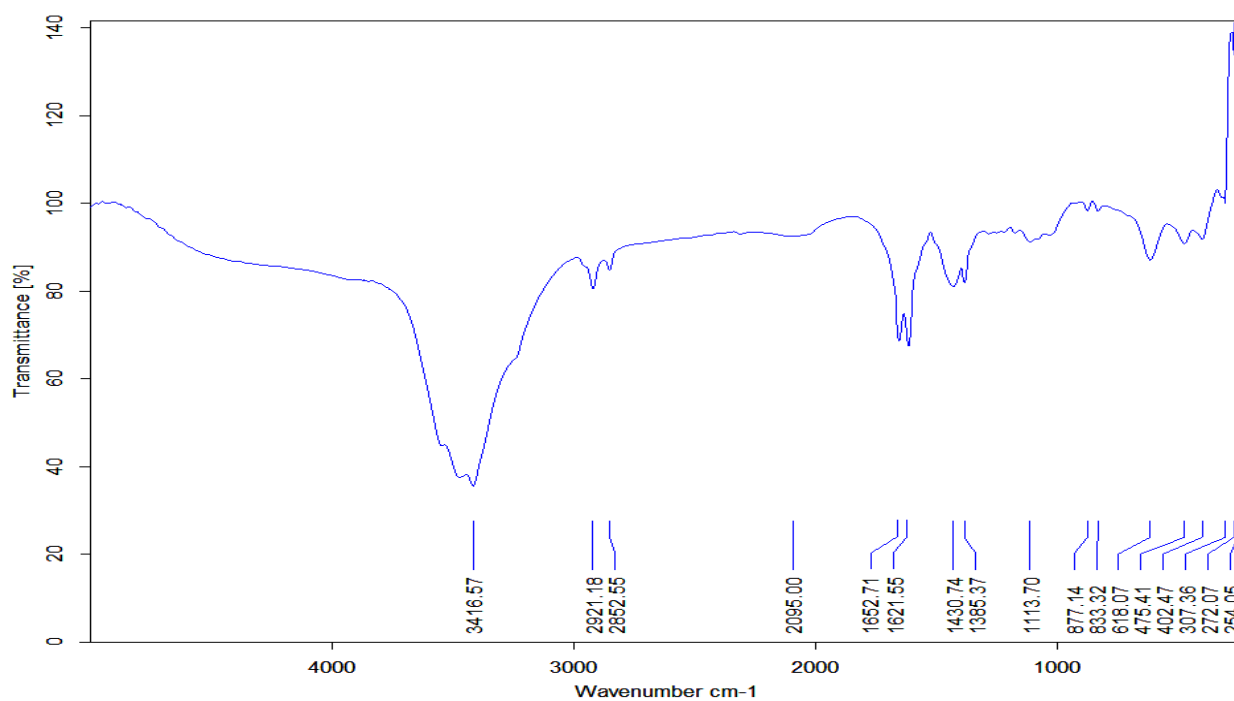

Figure S23. IR spectrum of compound (6) in KBr disc

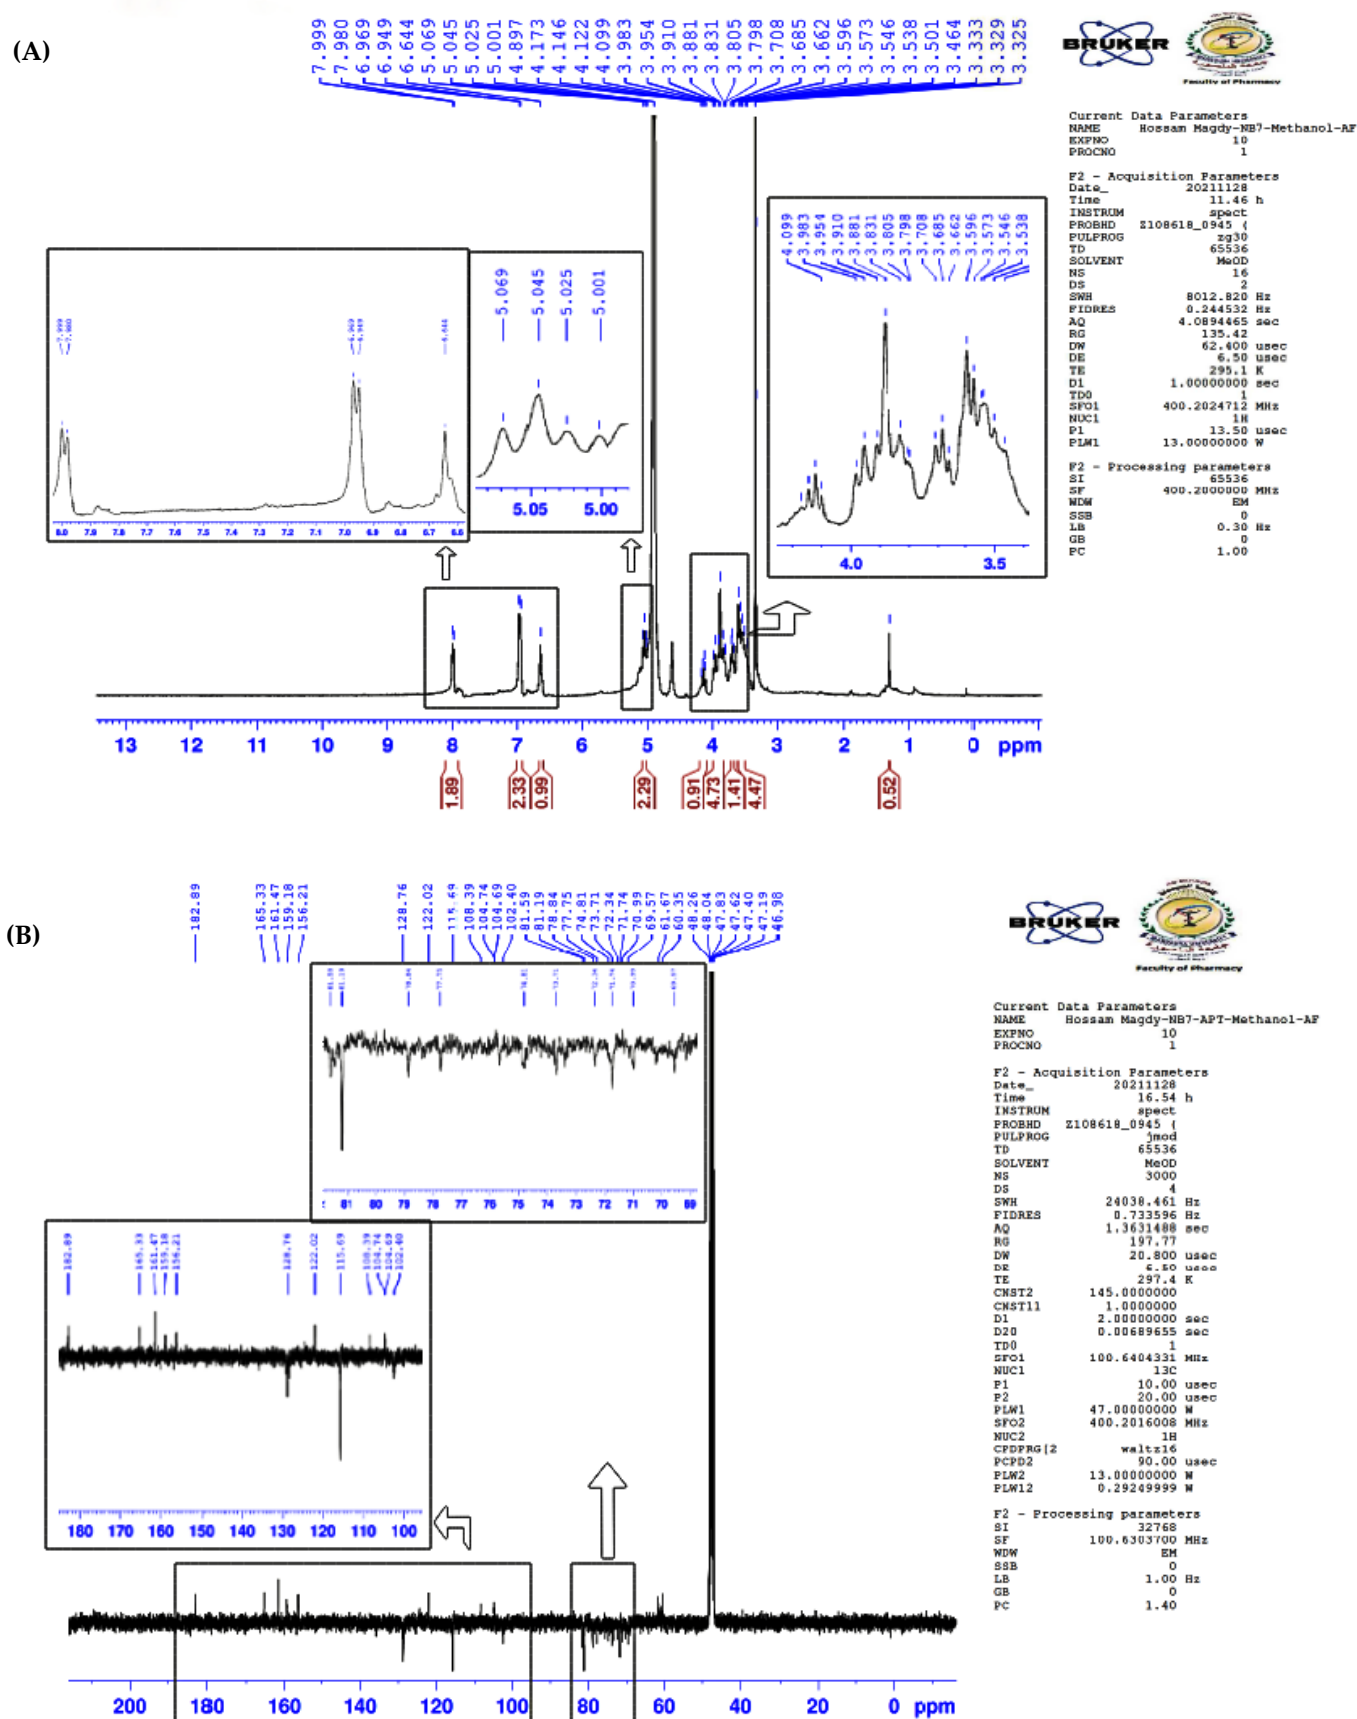Figure S24. (A)  $^1\text{H}$  and (B) APT NMR spectrum of compound (6) ( $\text{CD}_3\text{OD}$ )

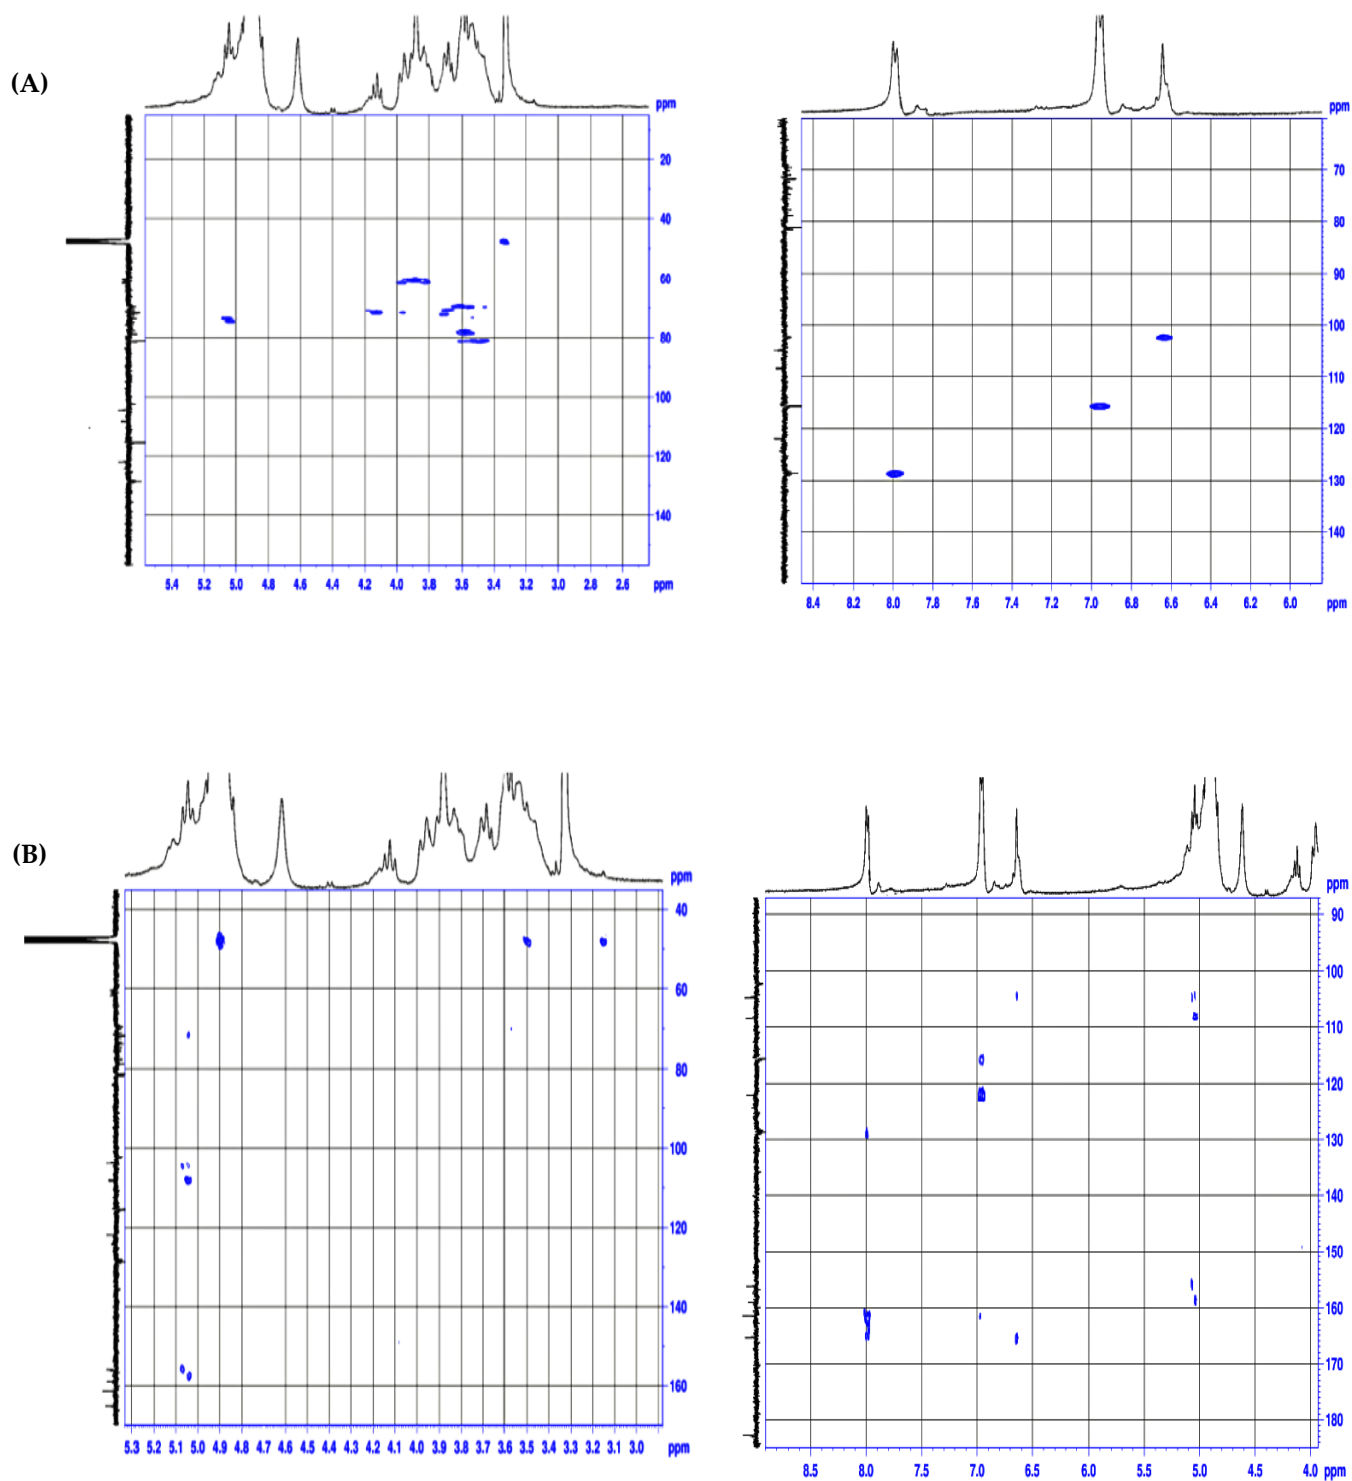

Figure S25. (A) HSQC and (B) HMBC spectrums of compound (6) (CD<sub>3</sub>OD)

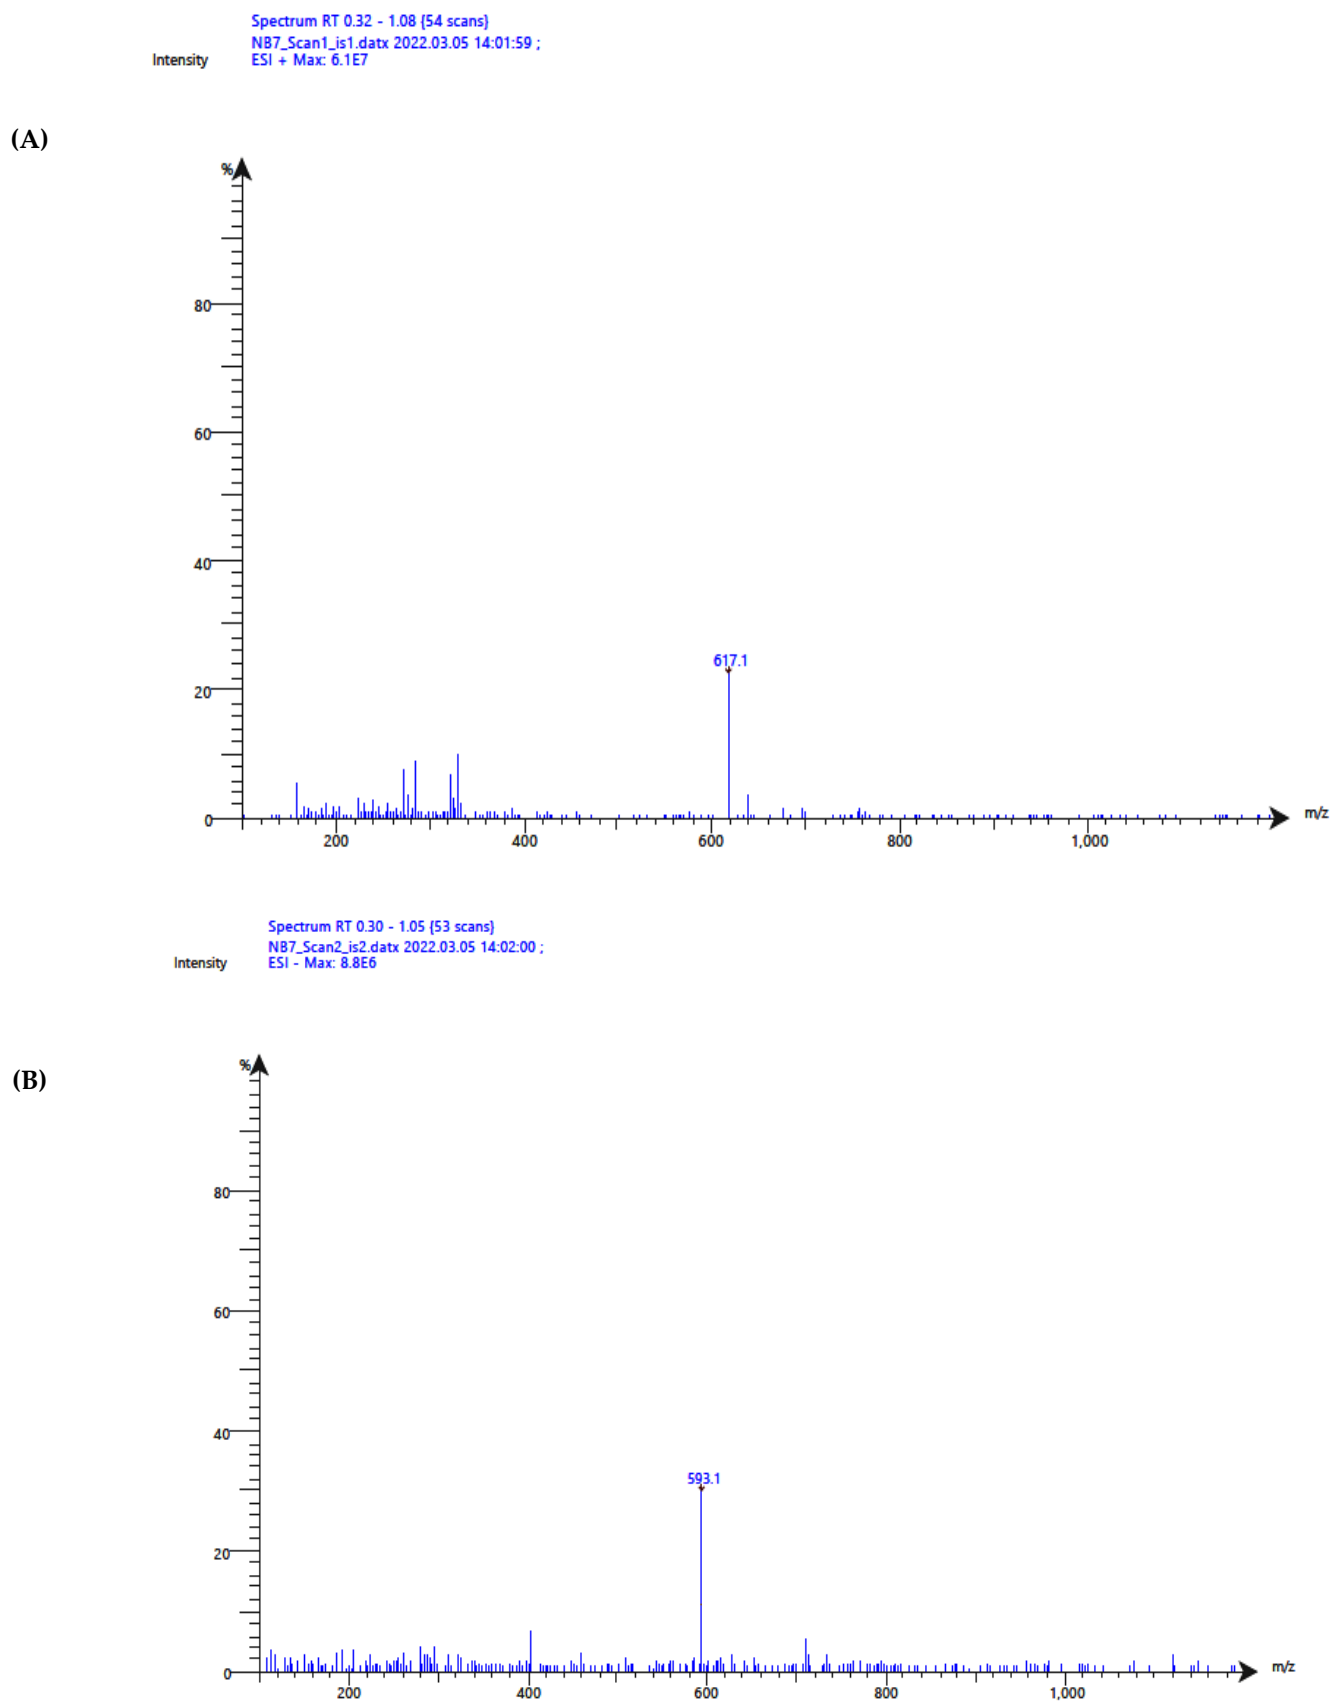

**Figure S26.** ESIMS "positive (A) and negative modes (B)" of compound (6)

(A)

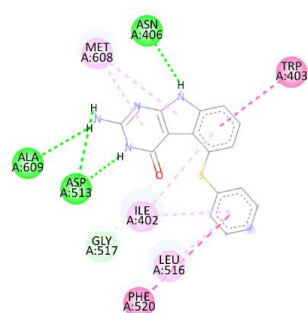

(B)

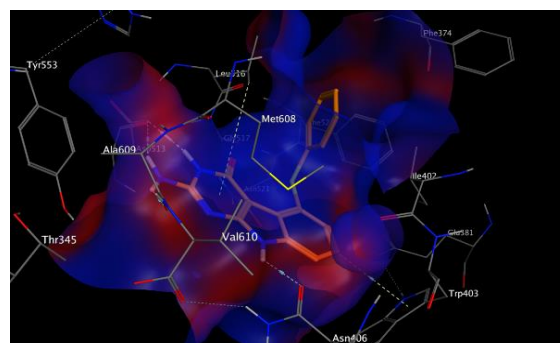

**Figure S27.** 2D (A) and 3D (B) patterns demonstrating the binding interaction of **1UE** into active site of TS-DHFR (PDB code: 4KY4). (A) Dotted pink and violet lines indicate hydrophobic interaction, and dotted green lines indicate hydrogen bonds. (B) Blue color surface refers a hydrophobic area and red color surface refers hydrophilic area.

(A)

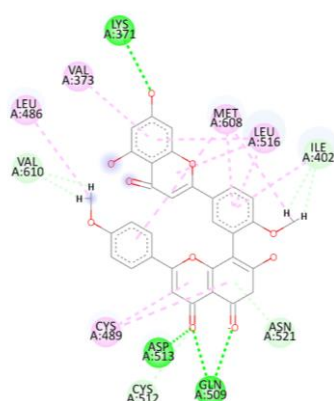

(B)

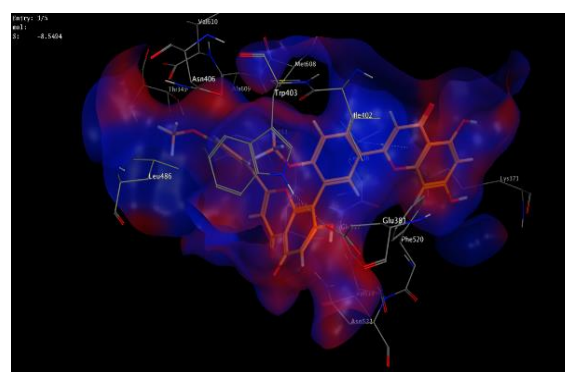

**Figure S28.** 2D (A) and 3D (B) patterns demonstrating the binding interaction of **Compound (1)** into active site of TS-DHFR (PDB code: 4KY4). (A) Dotted pink lines indicate hydrophobic interaction, and dotted green lines indicate hydrogen bonds. (B) Blue color surface refers a hydrophobic area and red color surface refers hydrophilic area.

(A)

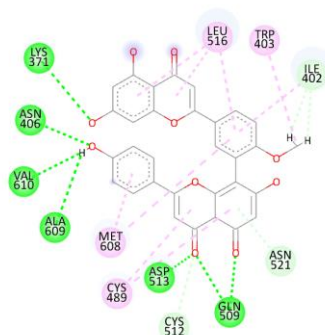

(B)

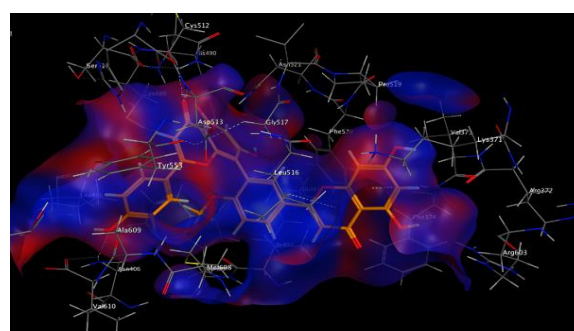

**Figure S29.** 2D (A) and 3D (B) patterns demonstrating the binding interaction of **Compound (2)** into active site of TS-DHFR (PDB code: 4KY4). (A) Dotted pink lines indicate hydrophobic interaction, and dotted green lines indicate hydrogen bonds. (B) Blue color surface refers a hydrophobic area and red color surface refers hydrophilic area.

(A)

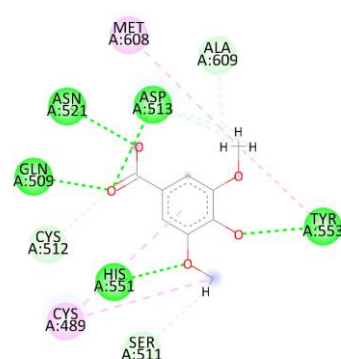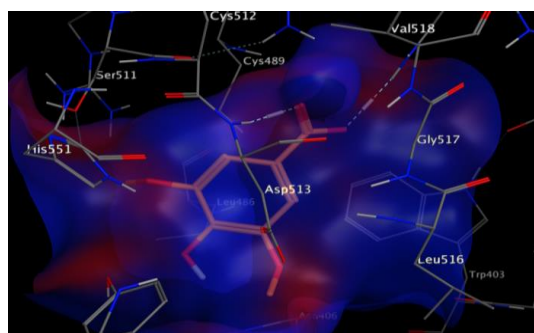

**Figure S30.** 2D (A) and 3D (B) patterns demonstrating the binding interaction of **Compound (3)** into active site of TS-DHFR (PDB code: 4KY4). (A) Dotted pink lines indicate hydrophobic interaction, and dotted green lines indicate hydrogen bonds. (B) Blue color surface refers a hydrophobic area and red color surface refers hydrophilic area.

(A)

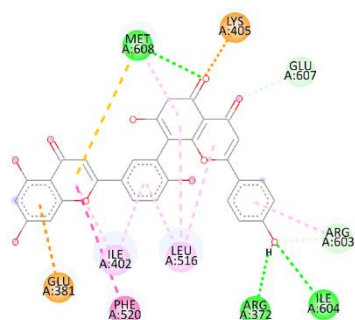

(B)

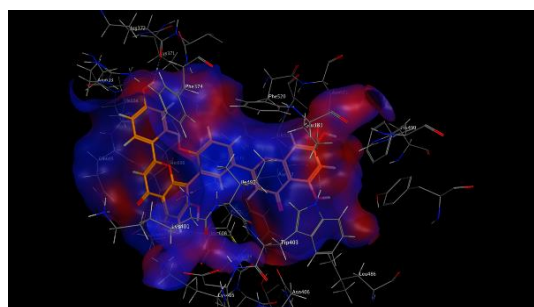

**Figure S31.** 2D (A) and 3D (B) patterns demonstrating the binding interaction of **Compound (4)** into active site of TS-DHFR (PDB code: 4KY4). (A) Dotted pink, violet and orange lines indicate hydrophobic interaction, and dotted green lines indicate hydrogen bonds. (B) Blue color surface refers a hydrophobic area and red color surface refers hydrophilic area.

(A)

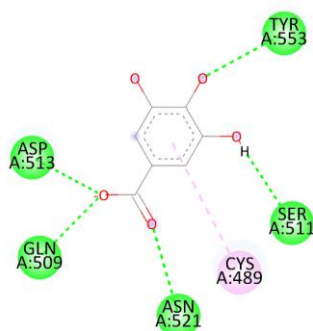

(B)

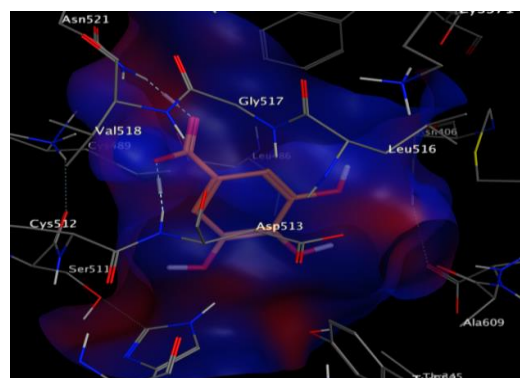

**Figure S32.** 2D (A) and 3D (B) patterns demonstrating the binding interaction of **Compound (5)** into active site of TS-DHFR (PDB code: 4KY4). (A) Dotted pink lines indicate hydrophobic interaction, and dotted green lines indicate hydrogen bonds. (B) Blue color surface refers a hydrophobic area and red color surface refers hydrophilic area.

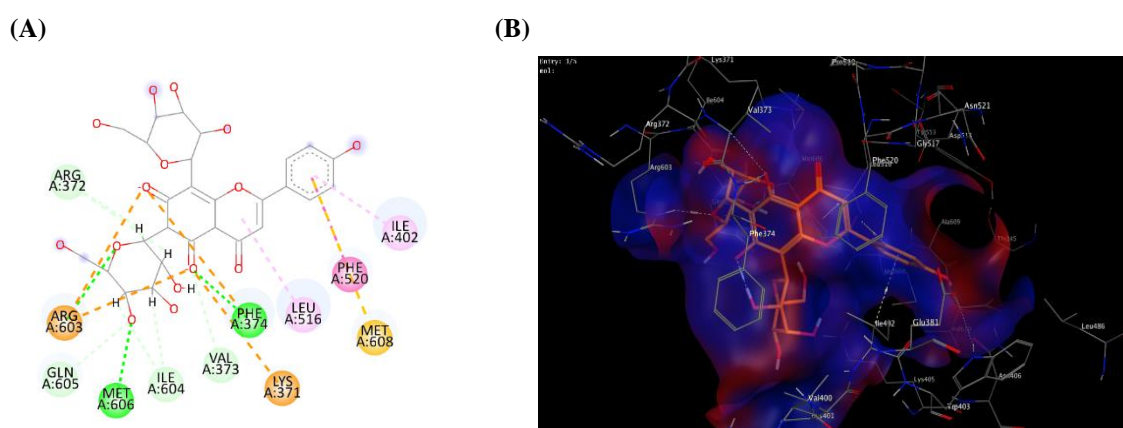

**Figure S33.** 2D (A) and 3D (B) patterns demonstrating the binding interaction of **Compound (6)** into active site of TS-DHFR (PDB code: 4KY4). (A) Dotted pink, violet and orange lines indicate hydrophobic interaction, and dotted green lines indicate hydrogen bonds. (B) Blue color surface refers a hydrophobic area and red color surface refers hydrophilic area.

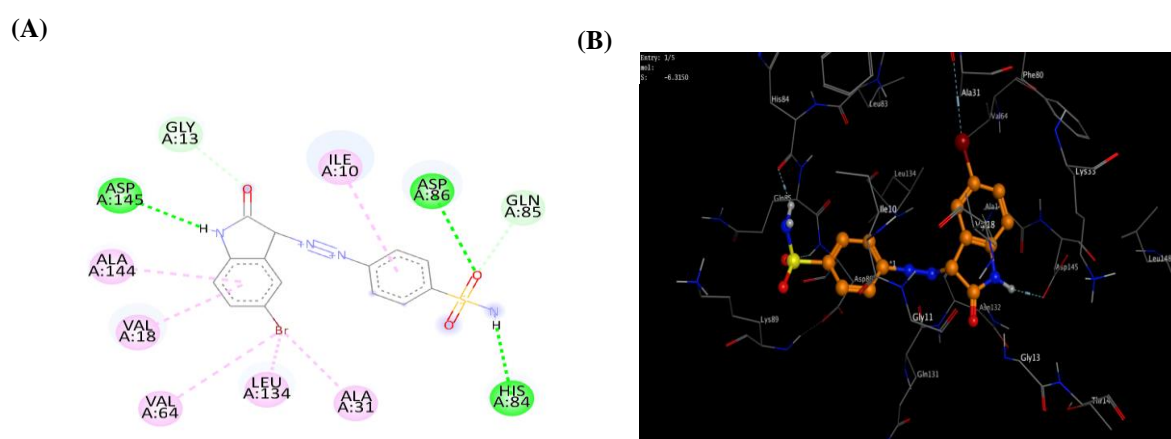

**Figure S34.** 2D (A) and 3D (B) patterns demonstrating the binding interaction of **(106)** into active site of CDK-2 (PDB ID: 1FVT). (A) Dotted pink lines indicate hydrophobic interaction, and dotted green lines indicate hydrogen bonds. (B) Blue color surface refers a hydrophobic area and red color surface refers hydrophilic area.

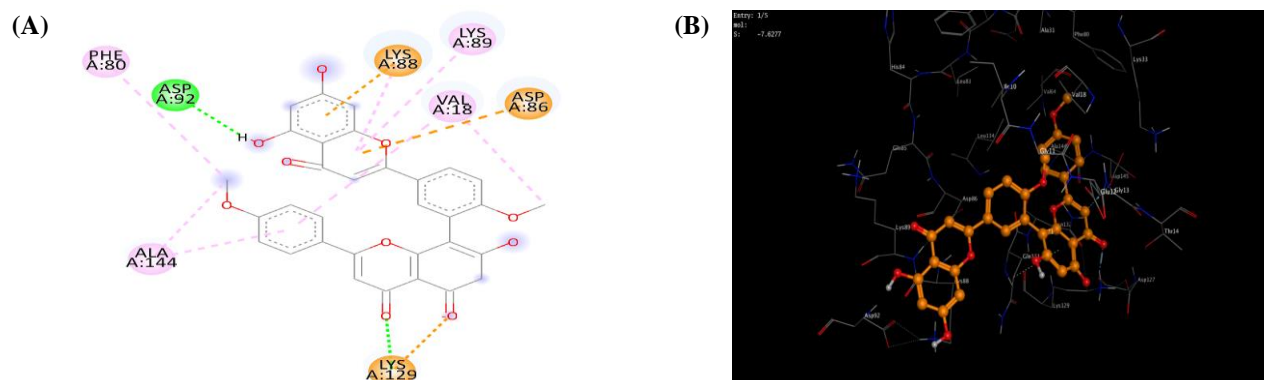

**Figure S35.** 2D (A) and 3D (B) patterns demonstrating the binding interaction of **compound (1)** into active site of CDK-2 (PDB ID: 1FVT). (A) Dotted pink and orange lines indicate hydrophobic interaction, and dotted green lines indicate hydrogen bonds. (B) Blue color surface refers a hydrophobic area and red color surface refers hydrophilic area.

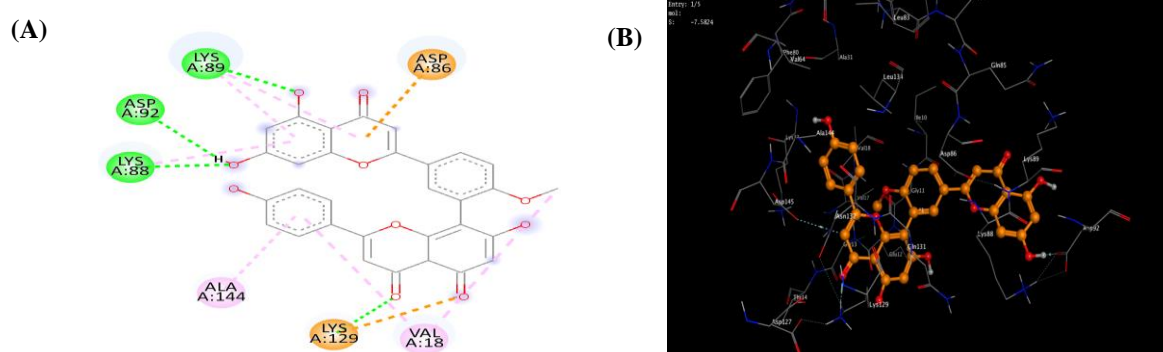

**Figure S36.** 2D (A) and 3D (B) patterns demonstrating the binding interaction of **compound (2)** into active site of CDK-2 (PDB ID: 1FVT). (A) Dotted pink, violet and orange lines indicate hydrophobic interaction, and dotted green lines indicate hydrogen bonds. (B) Blue color surface refers a hydrophobic area and red color surface refers hydrophilic area.

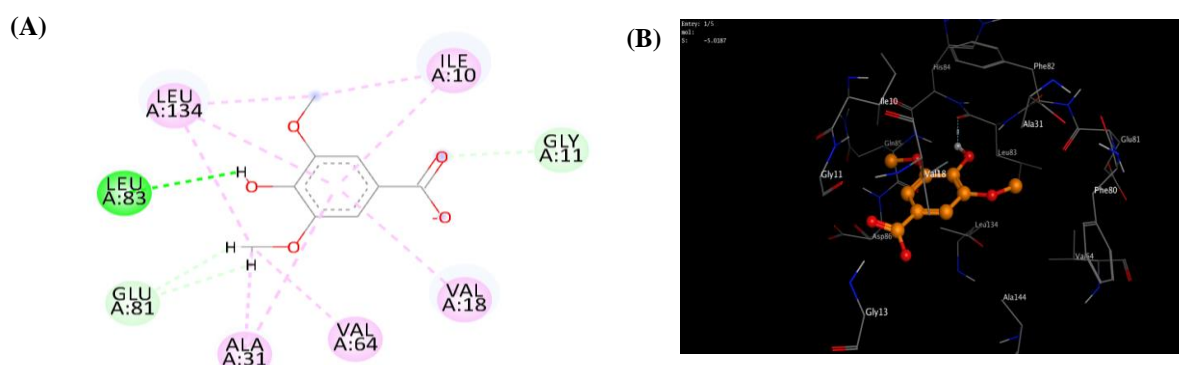

**Figure S37.** 2D (A) and 3D (B) patterns demonstrating the binding interaction of **compound (3)** into active site of CDK-2 (PDB ID: 1FVT). (A) Dotted pink lines indicate hydrophobic interaction, and dotted green lines indicate hydrogen bonds. (B) Blue color surface refers a hydrophobic area and red color surface refers hydrophilic area.

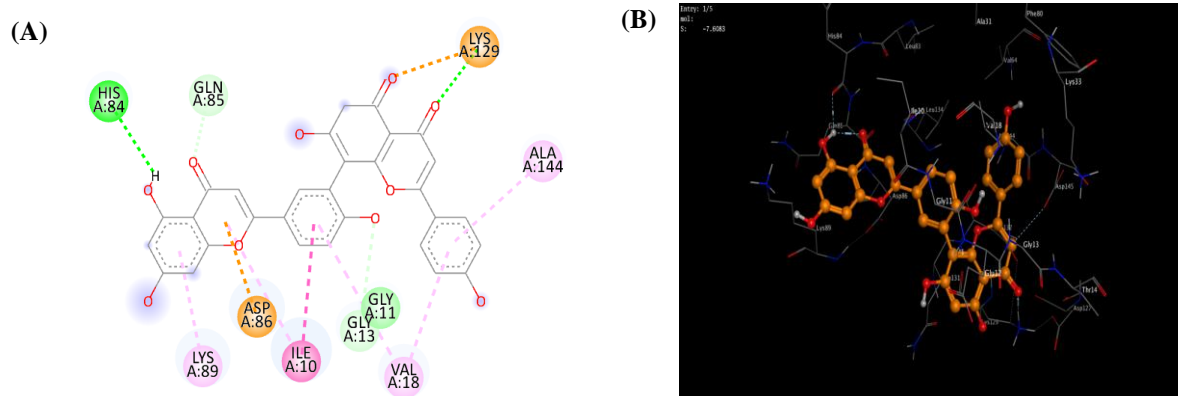

**Figure S38.** 2D (A) and 3D (B) patterns demonstrating the binding interaction of **compound (4)** into active site of CDK-2 (PDB ID: 1FVT). (A) Dotted pink, violet and orange lines indicate hydrophobic interaction, and dotted green lines indicate hydrogen bonds. (B) Blue color surface refers a hydrophobic area and red color surface refers hydrophilic area.

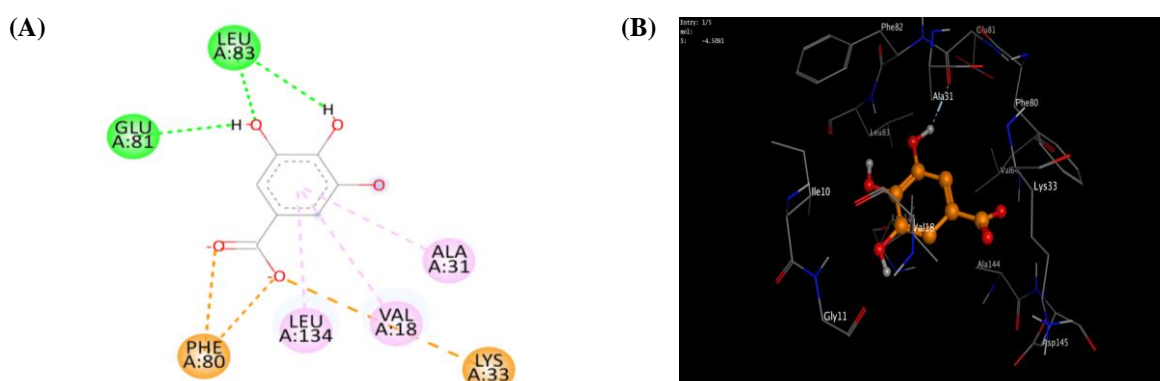

**Figure S39.** 2D (A) and 3D (B) patterns demonstrating the binding interaction of **compound (5)** into active site of CDK-2 (PDB ID: 1FVT). (A) Dotted pink and orange lines indicate hydrophobic interaction, and dotted green lines indicate hydrogen bonds. (B) Blue color surface refers a hydrophobic area and red color surface refers hydrophilic area.

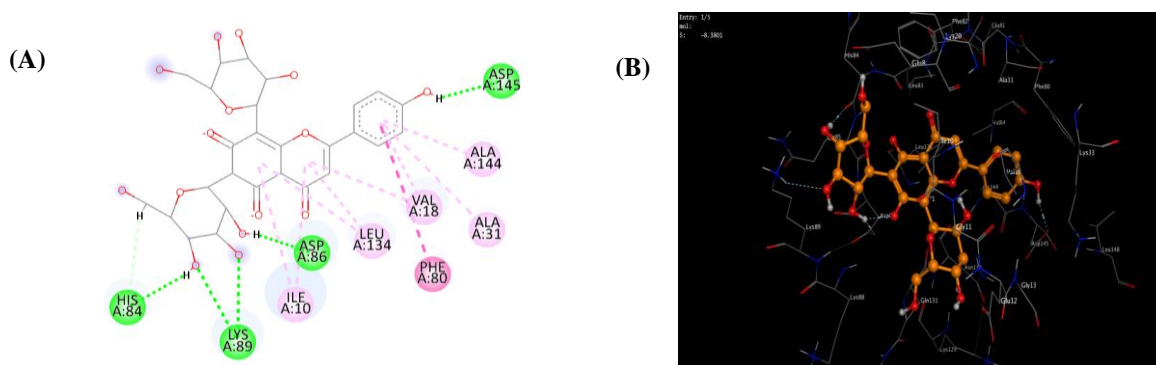

**Figure S40.** 2D (A) and 3D (B) patterns demonstrating the binding interaction of **compound (6)** into active site of CDK-2 (PDB ID: 1FVT). (A) Dotted pink and violet lines indicate hydrophobic interaction, and dotted green lines indicate hydrogen bonds. (B) Blue color surface refers a hydrophobic area and red color surface refers hydrophilic area.
